# Supplementary material for: Mitochondrial ClpX activates an essential biosynthetic enzyme through partial unfolding
Source: eLife journal article supplement (doi:10.7554/elife.54387), 2020-02-24
Supplement: supp [file elife_poa_e54387_Figure_3_figure_supplement_1.pdf › elife_poa_e54387_Figure_3_figure_supplement_1.pdf]

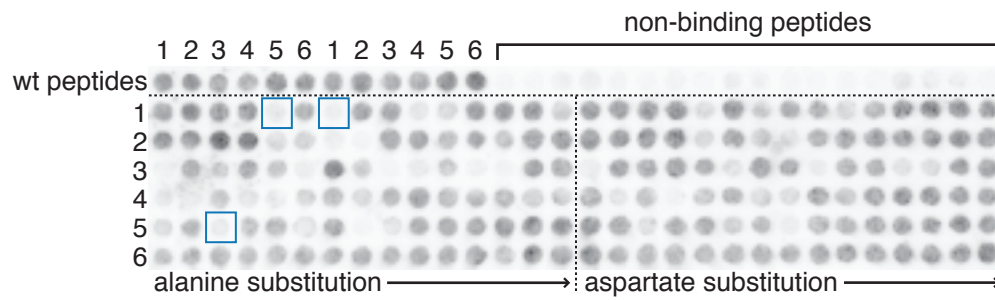

| peptide | position  | sequence         |
|---------|-----------|------------------|
| 1:      | (67-81)   | QESGFDY EGLIDSEL |
| 2:      | (196-210) | KMKDLVIF SDELNHA |
| 3:      | (226-240) | FKHNDLNELE QLLQS |
| 4:      | (248-262) | LIAFESVYS MAGSVA |
| 5:      | (272-286) | DKYGALTFL DEVHAV |
| 6:      | (472-486) | LSDILINAV DDVFNE |

**Figure 3—figure supplement 1**
