# Supplementary material for: Mitochondrial ClpX activates an essential biosynthetic enzyme through partial unfolding
Source: eLife journal article supplement (doi:10.7554/elife.54387), 2020-02-24
Supplement: supp [file elife_poa_e54387_Figure_4_figure_supplement_1.pdf › elife_poa_e54387_Figure_4_figure_supplement_1.pdf]

**A**

Exposure (Da):

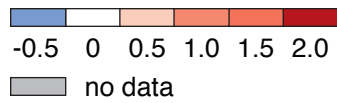**B****{ALAS-hxl + mtClpX} -  
{ALAS-hxl}**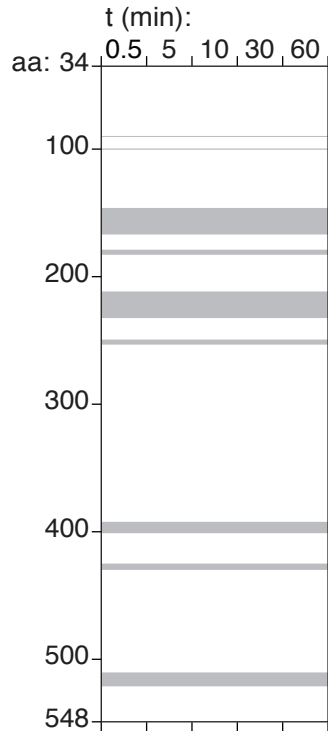**C****{ALAS-holo+mtClpX+ATP} -  
{ALAS-holo+ATP}**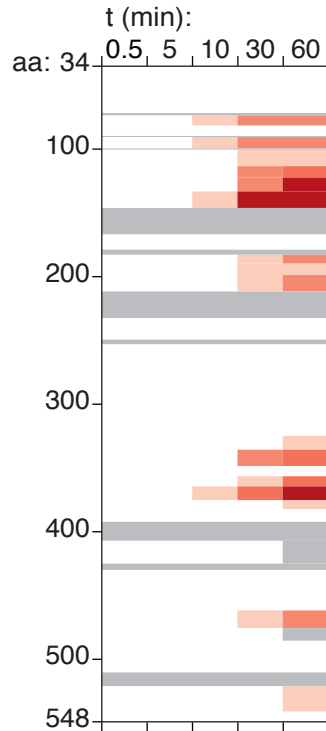**D****{ALAS-holo+mtClpX+ATP+PLP} -  
{ALAS-holo+mtClpX+ATP}**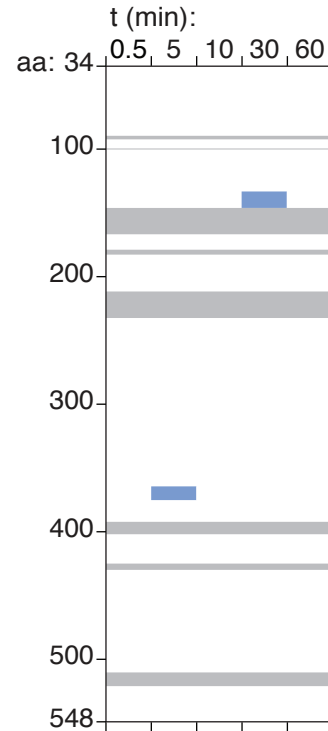**E**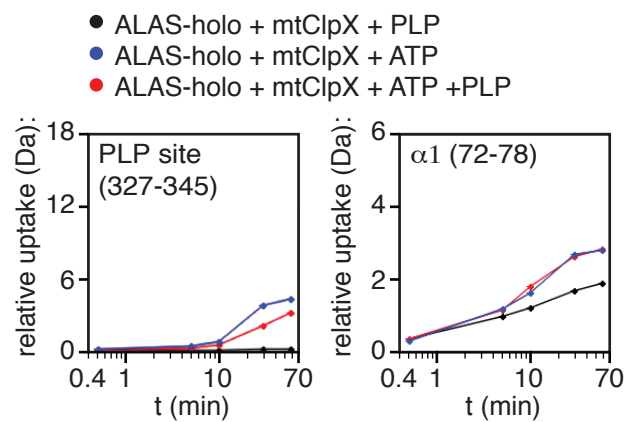**Figure 4—figure supplement 1**
