# Supplementary material for: Mitochondrial ClpX activates an essential biosynthetic enzyme through partial unfolding
Source: eLife. 2020 Feb 24;9:e54387. doi: 10.7554/eLife.54387 (PMC7077987; doi:10.7554/eLife.54387)
Supplement: Supplementary file 1. [file elife-54387-supp1.xlsx]

## Sheet: ALAS(hxl) relative uptake
Relative deuterium uptake of hydroxylamine-treated d34-ALAS											% maximal uptake	0.19	0.29	0.39	0.49	0.59	0.69
for each peptide, numbers are displayed at left, corresponding heat map to the right												<20	20-30	30-40	40-50	50-60	> 60
				t (min)								time (min)
sequence	linear	start	end	0.083	0.5	3	5	10	30	60		0.5	5	10	30	60
ATATGAGAA		35	43	0.5581	0.5662	0.5655	0.5716	0.5742	0.5716	0.5814		0.5662	0.5716	0.5742	0.5716	0.5814
ATATGAGAAAAT	*	35	46	0.6158	0.6347	0.6308	0.6246	0.6308	0.6402	0.617		0.6347	0.6246	0.6308	0.6402	0.617
ATGAGAAAATA		37	47	0.5959	0.613	0.6106	0.6108	0.6123	0.6213	0.6031		0.613	0.6108	0.6123	0.6213	0.6031
ATATGAGAAAATATASST		35	52	0.5606	0.5667	0.5644	0.5698	0.5689	0.5784	0.5645		0.5667	0.5698	0.5689	0.5784	0.5645
ATATGAGAAAATATASSTHAAA		35	56	0.5882	0.5939	0.5838	0.5917	0.5907	0.5953	0.5852		0.5939	0.5917	0.5907	0.5953	0.5852
ATATGAGAAAATATASSTHAAAA		35	57	0.6042	0.6075	0.6028	0.6031	0.6068	0.6092	0.5989		0.6075	0.6031	0.6068	0.6092	0.5989
ATATGAGAAAATATASSTHAAAAA		35	58	0.6138	0.6187	0.6143	0.6142	0.6209	0.6215	0.6114		0.6187	0.6142	0.6209	0.6215	0.6114
TATASSTHAAAAAAAAANHSTQE		46	68	0.5131	0.527	0.5221	0.5232	0.5293	0.528	0.5248		0.527	0.5232	0.5293	0.528	0.5248
TATASSTHAAAAAAAAANHSTQESGF		46	71	0.4943	0.5099	0.5137	0.5171	0.5154	0.5217	0.5127		0.5099	0.5171	0.5154	0.5217	0.5127
ATASSTHAAAAAAAAANHSTQESGF	*	47	71	0.4797	0.4975	0.4997	0.4999	0.5052	0.5085	0.501		0.4975	0.4999	0.5052	0.5085	0.501
TASSTHAAAAAAAAANHSTQESGF		48	71	0.4877	0.5022	0.5045	0.5091	0.5118	0.5143	0.5085		0.5022	0.5091	0.5118	0.5143	0.5085
ASSTHAAAAAAAAANHSTQESGF		49	71	0.5012	0.5211	0.5214	0.5243	0.5264	0.5325	0.5219		0.5211	0.5243	0.5264	0.5325	0.5219
HAAAAAAAAANHSTQESGFD		53	72	0.5041	0.5253	0.5319	0.5307	0.5349	0.5374	0.5319		0.5253	0.5307	0.5349	0.5374	0.5319
AAAAAANHSTQESGF		57	71	0.4634	0.4966	0.5009	0.5031	0.5054	0.5111	0.5002		0.4966	0.5031	0.5054	0.5111	0.5002
AAAAAANHSTQESGFD		57	72	0.4916	0.5203	0.5266	0.5224	0.5249	0.535	0.5239		0.5203	0.5224	0.5249	0.535	0.5239
AAAAANHSTQESGF		58	71	0.4429	0.4691	0.4772	0.4806	0.4838	0.4862	0.4764		0.4691	0.4806	0.4838	0.4862	0.4764
AAAANHSTQESGF		59	71	0.4087	0.4417	0.4512	0.451	0.4501	0.4536	0.4495		0.4417	0.451	0.4501	0.4536	0.4495
AAANHSTQESGF		60	71	0.3435	0.3739	0.3847	0.384	0.3912	0.392	0.3861		0.3739	0.384	0.3912	0.392	0.3861
AANHSTQESGF		61	71	0.3354	0.3669	0.3801	0.3759	0.384	0.3776	0.3684		0.3669	0.3759	0.384	0.3776	0.3684
HSTQESGFD		64	72	0.3878	0.42	0.4338	0.4381	0.4455	0.4466	0.4284		0.42	0.4381	0.4455	0.4466	0.4284
DYEGLID		72	78	0.033	0.0704	0.1465	0.1654	0.2231	0.3012	0.3253		0.0704	0.1654	0.2231	0.3012	0.3253
DYEGLIDSEL	*	72	81	0.0194	0.0418	0.1135	0.1346	0.2091	0.281	0.3199		0.0418	0.1346	0.2091	0.281	0.3199
YEGLIDSEL		73	81	0.0059	0.0152	0.0733		0.16	0.2613	0.2864		0.0152	100	0.16	0.2613	0.2864
EGLIDSEL		74	81	0.0182	0.0316	0.0793	0.1054	0.1579	0.2384	0.2589		0.0316	0.1054	0.1579	0.2384	0.2589
IDSELQKKRLDKS		77	89	0.0183	0.045	0.152	0.1897	0.2764	0.3614	0.3833		0.045	0.1897	0.2764	0.3614	0.3833
ELQKKRLDKS		80	89	0.043	0.1016	0.2252	0.2796	0.3658	0.4544	0.4811		0.1016	0.2796	0.3658	0.4544	0.4811
LQKKRLDKS		81	89	0.0377	0.0977	0.2296	0.2699	0.3627	0.4407	0.4621		0.0977	0.2699	0.3627	0.4407	0.4621
DYEGLIDSELQKKRLDKSYRYFNNINRL		72	99	0.0561	0.1085	0.2142	0.2445	0.3009	0.3698	0.3931		0.1085	0.2445	0.3009	0.3698	0.3931
QKKRLDKS	*	82	89	0.0384	0.0956	0.2359	0.2768	0.3657	0.4393	0.4609		0.0956	0.2768	0.3657	0.4393	0.4609
KKRLDKS		83	89	0.0419	0.0922	0.2556	0.3053	0.4102	0.5052	0.5166		0.0922	0.3053	0.4102	0.5052	0.5166
QKKRLDKSYRY		82	92	0.0703	0.2053	0.3767	0.4125	0.479	0.5307	0.5319		0.2053	0.4125	0.479	0.5307	0.5319
QKKRLDKSYRYFNNINRL		82	99	0.0882	0.1542	0.2584	0.2768	0.3083	0.3417	0.3488		0.1542	0.2768	0.3083	0.3417	0.3488
YRYFNNI		90	96	0.1794	0.2475	0.3509	0.3562	0.3788	0.3763	0.3797		0.2475	0.3562	0.3788	0.3763	0.3797
RYFNNINRL	*	91	99	0.0927	0.1108	0.142	0.1478	0.1622	0.1821	0.2071		0.1108	0.1478	0.1622	0.1821	0.2071
YRYFNNINRLAKEFPLAHRQREAD		90	113	0.1213	0.1655	0.2177	0.2254	0.2431	0.2647	0.2695		0.1655	0.2254	0.2431	0.2647	0.2695
INRLAKEFPLAHRQREAD		96	113	0.1613	0.2052	0.2502	0.2556	0.2747	0.288	0.3001		0.2052	0.2556	0.2747	0.288	0.3001
KEFPLAHRQREAD	*	101	113	0.1758	0.2294	0.2782	0.2892	0.3136	0.337	0.3405		0.2294	0.2892	0.3136	0.337	0.3405
FPLAHRQREAD		103	113	0.2167	0.2478	0.273	0.2841	0.2922	0.3308	0.3334		0.2478	0.2841	0.2922	0.3308	0.3334
AKEFPLAHRQREADKVTV		100	117	0.1163	0.1544	0.2007	0.2121	0.2319	0.2463	0.2508		0.1544	0.2121	0.2319	0.2463	0.2508
FPLAHRQREADKVTVW		103	118	0.1051	0.1276	0.1634	0.1686	0.1868	0.1955	0.2068		0.1276	0.1686	0.1868	0.1955	0.2068
PLAHRQREADKVTVW		104	118	0.1232	0.157	0.1993	0.2112	0.2389	0.2478	0.2542		0.157	0.2112	0.2389	0.2478	0.2542
KVTVWCSND	*	114	122	0.0929	0.1695	0.2798	0.2977	0.302	0.3116	0.3285		0.1695	0.2977	0.302	0.3116	0.3285
KVTVWCSNDY		114	123	0.1097	0.1524	0.2344	0.2453	0.255	0.2744	0.2733		0.1524	0.2453	0.255	0.2744	0.2733
YLALSKHPEVL	*	123	133	0.0198	0.023	0.0277	0.0318	0.0325	0.0321	0.0369		0.023	0.0318	0.0325	0.0321	0.0369
LALSKHPEVL		124	133	0.023	0.0353	0.0411	0.0358	0.0375	0.0362	0.0461		0.0353	0.0358	0.0375	0.0362	0.0461
DAMHKTID		134	141	0.0335	0.0396	0.0508	0.0637	0.0751	0.0962	0.1241		0.0396	0.0637	0.0751	0.0962	0.1241
DAMHKTIDKYGCG	*	134	146	0.0303	0.04	0.0449	0.0518	0.0615	0.0789	0.1033		0.04	0.0518	0.0615	0.0789	0.1033
HKTIDKYGCG		137	146	0.0353	0.0371	0.0345	0.0416	0.0387	0.0456	0.0606		0.0371	0.0416	0.0387	0.0456	0.0606
DAMHKTIDKYGCGAGGTRN		134	152	0.053	0.0751	0.1097	0.1166	0.135	0.1625	0.1934		0.0751	0.1166	0.135	0.1625	0.1934
HKTIDKYGCGAGGTRN		137	152	0.0465	0.0852	0.121	0.1305	0.1445	0.1601	0.1837		0.0852	0.1305	0.1445	0.1601	0.1837
DAMHKTIDKYGCGAGGTRNIAGHNIPTL		134	161	0.0617	0.0781	0.101	0.1062	0.1246	0.1509	0.1802		0.0781	0.1062	0.1246	0.1509	0.1802
LATLHKKEGAL		167	177	0.0276	0.0441	0.0669	0.0555	0.0612	0.057	0.0598		0.0441	0.0555	0.0612	0.057	0.0598
TLHKKEGAL		169	177	0.0271	0.054	0.0735	0.0719	0.0755	0.073	0.0776		0.054	0.0719	0.0755	0.073	0.0776
ATLHKKEGALVF	*	168	179	0.0125	0.0277	0.0381	0.0378	0.0386	0.0391	0.0404		0.0277	0.0378	0.0386	0.0391	0.0404
HKKEGALVF		171	179	0.0229	0.0492	0.0622	0.0573	0.0604	0.0579	0.0595		0.0492	0.0573	0.0604	0.0579	0.0595
VANDAVL	*	184	190		0.0045	0.0048	0.0011	0.003	-0.0008	0.0035		0.0045	0.0011	0.003	-0.0008	0.0035
SLLGQKMKD	*	191	199	0.1162	0.1788	0.1897	0.1951	0.2127	0.2618	0.3048		0.1788	0.1951	0.2127	0.2618	0.3048
LLGQKMKD		192	199	0.0907	0.143	0.1537	0.163	0.1813	0.2223	0.2583		0.143	0.163	0.1813	0.2223	0.2583
LVIFSDELNHASM	*	200	212	0.0298	0.0327	0.0394	0.0357	0.0406	0.0417	0.0552		0.0327	0.0357	0.0406	0.0417	0.0552
VIFSDELNHASM		201	212	0.0401	0.0475	0.0502	0.0505	0.0572	0.0641	0.0762		0.0475	0.0505	0.0572	0.0641	0.0762
FSDELNHASM		203	212	0.0603	0.0768	0.0883	0.0772	0.084	0.0864	0.1054		0.0768	0.0772	0.084	0.0864	0.1054
SDELNHASM		204	212	0.0721	0.0899	0.0939	0.0987	0.1045	0.1135	0.1346		0.0899	0.0987	0.1045	0.1135	0.1346
LEQLLQSYPKSVPKL		234	248	0.113	0.1302	0.1542	0.1645	0.1727	0.1787	0.1865		0.1302	0.1645	0.1727	0.1787	0.1865
EQLLQSYPKSVPKL		235	248	0.1076	0.1307	0.161	0.1699	0.1763	0.1851	0.191		0.1307	0.1699	0.1763	0.1851	0.191
LEQLLQSYPKSVPKLIA	*	234	250	0.0802	0.0937	0.1164	0.1232	0.1298	0.1352	0.1402		0.0937	0.1232	0.1298	0.1352	0.1402
EQLLQSYPKSVPKLIA		235	250	0.101	0.1106	0.1363	0.147	0.1546	0.1598	0.1649		0.1106	0.147	0.1546	0.1598	0.1649
LLQSYPKSVPKL		237	248	0.1475	0.1655	0.1841	0.1879	0.1988	0.2041	0.2163		0.1655	0.1879	0.1988	0.2041	0.2163
LLQSYPKSVPKLIA		237	250	0.1209	0.1381	0.1588	0.1636	0.1672	0.1753	0.179		0.1381	0.1636	0.1672	0.1753	0.179
QSYPKSVPKL		239	248	0.1508	0.1775	0.2057	0.2082	0.2204	0.231	0.2382		0.1775	0.2082	0.2204	0.231	0.2382
QSYPKSVPKLIA		239	250	0.1328	0.1465	0.1442	0.146	0.1478	0.155	0.1612		0.1465	0.146	0.1478	0.155	0.1612
YPKSVPKL		241	248	0.2105	0.2354	0.2194	0.2297	0.2336	0.2419	0.2503		0.2354	0.2297	0.2336	0.2419	0.2503
YSMAGSV	*	255	261	0.2352	0.2496	0.3203	0.3531	0.4147	0.5154	0.5387		0.2496	0.3531	0.4147	0.5154	0.5387
YSMAGSVA		255	262	0.2037	0.2263	0.288	0.3165	0.3752	0.4473	0.4764		0.2263	0.3165	0.3752	0.4473	0.4764
YSMAGSVAD		255	263	0.2062	0.2386	0.3409	0.3662	0.4186	0.4903	0.5089		0.2386	0.3662	0.4186	0.4903	0.5089
YSMAGSVADI		255	264	0.1602	0.1862	0.259	0.2852	0.3343	0.4045	0.4331		0.1862	0.2852	0.3343	0.4045	0.4331
YSMAGSVADIE		255	265	0.105	0.1216	0.1954	0.2078	0.2497	0.3075	0.3322		0.1216	0.2078	0.2497	0.3075	0.3322
GSVADIE		259	265	0.2483	0.2598	0.2935	0.2876	0.3224	0.3559	0.3623		0.2598	0.2876	0.3224	0.3559	0.3623
ADIEKICDL	*	262	270	0.008	0.0011	0.0114	0.01	0.0342	0.0661	0.0946		0.0011	0.01	0.0342	0.0661	0.0946
DIEKICD		263	269	0.0246	0.029	0.0399	0.0376	0.0617	0.1022	0.132		0.029	0.0376	0.0617	0.1022	0.132
LADKYGAL		270	277	0.0248	0.0464	0.0978	0.1084	0.1255	0.1377	0.148		0.0464	0.1084	0.1255	0.1377	0.148
LADKYGALT		270	278	0.0223	0.0415	0.074	0.085	0.0904	0.1	0.1139		0.0415	0.085	0.0904	0.1	0.1139
ADKYGAL		271	277	0.0256	0.0428	0.0913	0.1079	0.1273	0.1345	0.1491		0.0428	0.1079	0.1273	0.1345	0.1491
ADKYGALTF	*	271	279	0.0215	0.0385	0.0806	0.094	0.1029	0.1119	0.1209		0.0385	0.094	0.1029	0.1119	0.1209
TFLDEVHAVGL		278	288	0.0098	0.0052	0.0125	0.0011	0.0075	-0.0039	0.0036		0.0052	0.0011	0.0075	-0.0039	0.0036
LDEVHAVGL	*	280	288	0.0152	0.0177	0.0187	0.0203	0.0229	0.0179	0.0255		0.0177	0.0203	0.0229	0.0179	0.0255
DEVHAVGLYGPHGAG		281	295	0.0176	0.0132	0.015	0.0125	0.0158	0.0143			0.0132	0.0125	0.0158	0.0143	100
FLDEVHAVGLYGPHGAGVAE		279	298	0.0108	0.0082	0.0089		0.0115				0.0082	100	0.0115	100	100
LDEVHAVGLYGPHGAGVAE		280	298	0.0128	0.0118	0.0121	0.0134	0.0139	0.0137	0.0189		0.0118	0.0134	0.0139	0.0137	0.0189
DEVHAVGLYGPHGAGVAE		281	298	0.0108	0.0106	0.0119	0.0112	0.0116	0.01	0.0205		0.0106	0.0112	0.0116	0.01	0.0205
VGLYGPHGAG		286	295	0.0471	0.0446	0.0459	0.0454	0.0472	0.0434	0.0522		0.0446	0.0454	0.0472	0.0434	0.0522
VGLYGPHGAGVAE		286	298	0.0385	0.0379	0.042	0.0357	0.0388	0.0309	0.0434		0.0379	0.0357	0.0388	0.0309	0.0434
YGPHGAG	*	289	295	0.0546	0.0664	0.0687	0.0731	0.0632	0.0571	0.0796		0.0664	0.0731	0.0632	0.0571	0.0796
LYGPHGAGVAE		288	298	0.0371	0.0386	0.0413	0.0349	0.0358	0.0336	0.04		0.0386	0.0349	0.0358	0.0336	0.04
YGPHGAGVAEHCDF		289	302	0.0117	0.0105	0.0153	0.0078	0.0152	0.0141	0.0319		0.0105	0.0078	0.0152	0.0141	0.0319
VAEHCDF	*	296	302	0.0347	0.0271	0.037	0.0341	0.0419	0.0487	0.0706		0.0271	0.0341	0.0419	0.0487	0.0706
ESHRASGIAT		303	312	0.1115	0.1209	0.1411	0.1573	0.1851	0.2207	0.2409		0.1209	0.1573	0.1851	0.2207	0.2409
ESHRASGIATPKTNDKGGAKTVMD	*	303	326	0.1934	0.2648	0.2753	0.2809	0.2949	0.3187	0.3303		0.2648	0.2809	0.2949	0.3187	0.3303
IATPKTNDKGGAKTVM		310	325	0.3085	0.4225	0.4244	0.4242	0.4255	0.4312	0.4272		0.4225	0.4242	0.4255	0.4312	0.4272
IATPKTNDKGGAKTVMD		310	326	0.2731	0.3823	0.3898	0.3826	0.3957	0.4046	0.4061		0.3823	0.3826	0.3957	0.4046	0.4061
ATPKTNDKGGAKTVM		311	325	0.3079	0.4462	0.4501	0.4535	0.4678	0.4823	0.4818		0.4462	0.4535	0.4678	0.4823	0.4818
DRVDMIT		326	332	0.0038	0.0071	0.016	0.0187	0.0171	0.0138	0.0271		0.0071	0.0187	0.0171	0.0138	0.0271
DRVDMITGTLG	*	326	336	0.0145	0.0055	0.0084	0.011	0.0098	0.0116	0.0124		0.0055	0.011	0.0098	0.0116	0.0124
DRVDMITGTLGKSFGSVGG		326	344	0.0157	0.0168	0.0229	0.0228	0.0225	0.0269	0.0344		0.0168	0.0228	0.0225	0.0269	0.0344
ITGTLGKSF		331	339	0.0193	0.0322	0.0377	0.0256	0.0342	0.0332	0.0483		0.0322	0.0256	0.0342	0.0332	0.0483
DRVDMITGTLGKSFGSVGGY		326	345	0.012	0.0153	0.0158	0.0153	0.0167	0.0181	0.0284		0.0153	0.0153	0.0167	0.0181	0.0284
RVDMITGTLGKSFGSVGG		327	344	0.0162	0.0199	0.0227	0.022	0.0233	0.0214	0.0354		0.0199	0.022	0.0233	0.0214	0.0354
RVDMITGTLGKSFGSVGGY		327	345	0.0116	0.0157	0.0169	0.0199	0.0174	0.0196	0.0283		0.0157	0.0199	0.0174	0.0196	0.0283
DRVDMITGTLGKSFGSVGGYVAA		326	348	0.0122	0.0122	0.0142	0.0127	0.014	0.0149	0.0239		0.0122	0.0127	0.014	0.0149	0.0239
MITGTLGKSFGSVGGY		330	345	0.0214	0.0212	0.0236	0.0187	0.0266	0.0208	0.0335		0.0212	0.0187	0.0266	0.0208	0.0335
ITGTLGKSFGSVGGY		331	345	0.0209	0.0207	0.0206	0.0197	0.0232	0.0207	0.029		0.0207	0.0197	0.0232	0.0207	0.029
GTLGKSFGSVGG		333	344	0.0266	0.0326	0.0363	0.0373	0.037	0.0451	0.0555		0.0326	0.0373	0.037	0.0451	0.0555
MITGTLGKSFGSVGGYVAA		330	348	0.0095	0.0142	0.0167	0.0131	0.0147	0.0149	0.0232		0.0142	0.0131	0.0147	0.0149	0.0232
ITGTLGKSFGSVGGYVAA		331	348	0.0161	0.0178	0.0228	0.0168	0.0212	0.0217	0.0274		0.0178	0.0168	0.0212	0.0217	0.0274
DRVDMITGTLGKSFGSVGGYVAASRKLIDW		326	355	0.0081	0.0123	0.0269	0.0315	0.0407	0.0494	0.0622		0.0123	0.0315	0.0407	0.0494	0.0622
GKSFGSVGGYVAA	*	336	348	0.0156	0.0241	0.0245	0.0319	0.0245	0.0299	0.0384		0.0241	0.0319	0.0245	0.0299	0.0384
FGSVGGY		339	345	0.0307	0.0399	0.0423	0.0452	0.0392	0.0467	0.0498		0.0399	0.0452	0.0392	0.0467	0.0498
ITGTLGKSFGSVGGYVAASRKLIDW		331	355	0.0059	0.0106	0.0287	0.0359	0.046	0.0585	0.0752		0.0106	0.0359	0.046	0.0585	0.0752
GTLGKSFGSVGGYVAASRKLIDW		333	355	0.0074	0.0098	0.0348	0.0368	0.0491	0.0622	0.0795		0.0098	0.0368	0.0491	0.0622	0.0795
GKSFGSVGGYVAASRKLIDW		336	355	0.0044	0.0126	0.0379	0.044	0.0539	0.0661	0.0851		0.0126	0.044	0.0539	0.0661	0.0851
YVAASRKLIDW		345	355	0.0062	0.0135	0.0526	0.0651	0.0842	0.1067	0.123		0.0135	0.0651	0.0842	0.1067	0.123
VAASRKLIDWF		346	356	0.008	0.0193	0.0586	0.0721	0.0888	0.1084	0.1189		0.0193	0.0721	0.0888	0.1084	0.1189
AASRKLIDW		347	355	0.0131	0.0249	0.0599	0.0715	0.0921	0.1127	0.1285		0.0249	0.0715	0.0921	0.1127	0.1285
ASRKLIDW		348	355	0.0089	0.0273	0.0711	0.0826	0.1005	0.1124	0.1206		0.0273	0.0826	0.1005	0.1124	0.1206
SRKLIDWF	*	349	356	0.0072	0.0181	0.0464	0.0452	0.0598	0.0527	0.055		0.0181	0.0452	0.0598	0.0527	0.055
FRSFAPGF	*	356	363	0.0107	0.0387	0.0864	0.0953	0.1151	0.1328	0.156		0.0387	0.0953	0.1151	0.1328	0.156
RSFAPGF		357	363	0.0217	0.0426	0.1165	0.1231	0.1476	0.1745	0.2099		0.0426	0.1231	0.1476	0.1745	0.2099
IFTTTLPPSVM	*	364	374	0.0084	0.011	0.0125	0.004	0.0153	0.0152	0.0315		0.011	0.004	0.0153	0.0152	0.0315
FTTTLPPSVM		365	374	0.006	0.0129	0.0068	0.0221	0.0189	0.0195	0.0363		0.0129	0.0221	0.0189	0.0195	0.0363
TTTLPPSVM		366	374	0.0047	0.0097	0.0057	0.0096	0.0152	0.0187	0.03		0.0097	0.0096	0.0152	0.0187	0.03
TTLPPSVM		367	374	-0.0018	0.0092	0.0145	0.0188	0.0114	0.0227	0.0315		0.0092	0.0188	0.0114	0.0227	0.0315
MAGATAA	*	374	380	0.0327	0.0452	0.0609	0.0466	0.0463	0.0392	0.0514		0.0452	0.0466	0.0463	0.0392	0.0514
AGATAAIRYQRCHIDL		375	390	0.0071	0.0098	0.0046	0.0078	0.0116	0.0135	0.0283		0.0098	0.0078	0.0116	0.0135	0.0283
AAIRYQRC		379	386	0.0312	0.0448	0.0512	0.0448	0.0463	0.045	0.053		0.0448	0.0448	0.0463	0.045	0.053
IRYQRCHIDL	*	381	390	0.0019	0.0046	0.002	0.0096	0.0057	0.0188	0.0312		0.0046	0.0096	0.0057	0.0188	0.0312
HIDLRTSQQKHTM		387	399	0.0227	0.0269	0.0279	0.0294	0.0316	0.0349	0.0542		0.0269	0.0294	0.0316	0.0349	0.0542
HIDLRTSQQKHTMY		387	400	0.0159	0.0155	0.0176	0.0175	0.0208	0.026	0.0369		0.0155	0.0175	0.0208	0.026	0.0369
YVKKAFHELGIPVIPNPSHIVPVL	*	400	423		0.0469	0.0809	0.0803	0.0983	0.1189	0.1344		0.0469	0.0803	0.0983	0.1189	0.1344
HELGIPVIPNPSHIVPVL		406	423	0.0484	0.0673	0.0973	0.1011	0.1162	0.1362	0.1636		0.0673	0.1011	0.1162	0.1362	0.1636
LGIPVIPNPSHIVPVL		408	423	0.0512	0.0611	0.0661	0.0662	0.0809	0.1016	0.1314		0.0611	0.0662	0.0809	0.1016	0.1314
IPVIPNPSHIVPVL		410	423	0.0632	0.0793	0.0833	0.0901	0.0972	0.1283	0.1624		0.0793	0.0901	0.0972	0.1283	0.1624
PNPSHIVPVL		414	423	0.0776	0.0943	0.1003	0.1203	0.129	0.1653	0.1912		0.0943	0.1203	0.129	0.1653	0.1912
LAKQASDIL	*	429	437	0.037	0.0303	0.035	0.0373	0.046	0.0631	0.0848		0.0303	0.0373	0.046	0.0631	0.0848
AKQASDIL		430	437	0.0151	0.0215	0.0232	0.0267	0.0301	0.0374	0.0585		0.0215	0.0267	0.0301	0.0374	0.0585
ILINKHQIYVQ		436	446	0.0197	0.0265	0.0452	0.0546	0.082	0.1344	0.1862		0.0265	0.0546	0.082	0.1344	0.1862
INKHQIY		438	444	0.0277	0.0376	0.0519	0.0696	0.0898	0.1156	0.1403		0.0376	0.0696	0.0898	0.1156	0.1403
ILINKHQIYVQA		436	447	0.0313	0.0629	0.087	0.0977	0.1235	0.1772	0.2199		0.0629	0.0977	0.1235	0.1772	0.2199
INKHQIYVQ	*	438	446	0.0116	0.0276	0.0422	0.0492	0.0873	0.1497	0.2159		0.0276	0.0492	0.0873	0.1497	0.2159
INFPTVA		448	454	0.1311	0.3341	0.4472	0.4585	0.4855	0.514	0.536		0.3341	0.4585	0.4855	0.514	0.536
AINFPTVARGTERL	*	447	460	0.0887	0.2093	0.2753	0.2841	0.303	0.3296	0.3476		0.2093	0.2841	0.303	0.3296	0.3476
PTVARGTERL		451	460	0.0792	0.1559	0.1878	0.1925	0.2192	0.2593	0.2922		0.1559	0.1925	0.2192	0.2593	0.2922
TVARGTERL		452	460	0.0815	0.154	0.2153	0.2141	0.2123	0.2608	0.288		0.154	0.2141	0.2123	0.2608	0.288
RITPTPGHTND		461	471	0.108	0.149	0.1765	0.1861	0.1945	0.221	0.2306		0.149	0.1861	0.1945	0.221	0.2306
RITPTPGHTNDL		461	472	0.0679	0.0946	0.118	0.1192	0.126	0.1527	0.1766		0.0946	0.1192	0.126	0.1527	0.1766
RITPTPGHTNDLSD	*	461	474	0.04	0.0669	0.0806	0.0849	0.1012	0.139	0.1806		0.0669	0.0849	0.1012	0.139	0.1806
RITPTPGHTNDLSDIL		461	476	0.0244	0.0385	0.0531	0.055	0.068	0.1043	0.1407		0.0385	0.055	0.068	0.1043	0.1407
PGHTNDL		466	472	0.0841	0.1042	0.1294	0.1374	0.1511	0.1773	0.2115		0.1042	0.1374	0.1511	0.1773	0.2115
ILINAVD		475	481	0.0201	0.0204	0.0295	0.0231	0.0256	0.019	0.0262		0.0204	0.0231	0.0256	0.019	0.0262
ILINAVDDVF	*	475	484	0.0014	-0.003	0.0035	-0.003	-0.0002	-0.0051	-0.0032		-0.003	-0.003	-0.0002	-0.0051	-0.0032
VDDVFNE		480	486	0.0139	0.0107	0.0128	0.0113	0.0177	0.0029	0.0229		0.0107	0.0113	0.0177	0.0029	0.0229
LQLPRVRD		487	494	0.119	0.1971	0.2233	0.2304	0.2767	0.3671	0.4319		0.1971	0.2304	0.2767	0.3671	0.4319
NELQLPRVRDWESQGGL	*	485	501	0.2306	0.3279	0.3609	0.3699	0.3915	0.4371	0.4635		0.3279	0.3699	0.3915	0.4371	0.4635
LQLPRVRDWESQGGL		487	501	0.2483	0.3548	0.3927	0.4012	0.4235	0.4635	0.4826		0.3548	0.4012	0.4235	0.4635	0.4826
PRVRDWESQGGLL		490	502	0.3331	0.4869	0.5373	0.54	0.5516	0.5702	0.5859		0.4869	0.54	0.5516	0.5702	0.5859
NELQLPRVRDWESQGGLLGVGESGF		485	509	0.2741	0.3922	0.4144	0.4287	0.4412	0.471	0.4868		0.3922	0.4287	0.4412	0.471	0.4868
LQLPRVRDWESQGGLLGVGESGF		487	509	0.3072	0.4392	0.4691	0.485	0.4916	0.5192	0.5251		0.4392	0.485	0.4916	0.5192	0.5251
WESQGGL		495	501	0.3631	0.4173	0.4149	0.4136	0.418	0.418	0.4172		0.4173	0.4136	0.418	0.418	0.4172
PRVRDWESQGGLLGVGESG		490	508	0.3683	0.5216	0.5645	0.5664	0.5755	0.5833	0.5883		0.5216	0.5664	0.5755	0.5833	0.5883
WESQGGLLG		495	503	0.3329	0.452	0.4622	0.4715	0.467	0.4758	0.4729		0.452	0.4715	0.467	0.4758	0.4729
PRVRDWESQGGLLGVGESGF		490	509	0.366	0.5166	0.5512	0.5605	0.5601	0.5764	0.5786		0.5166	0.5605	0.5601	0.5764	0.5786
WESQGGLLGVG		495	505	0.3103	0.4425	0.4636	0.4692	0.4677	0.4623	0.4669		0.4425	0.4692	0.4677	0.4623	0.4669
WESQGGLLGVGESG		495	508	0.3686	0.48	0.4929	0.4958	0.4979	0.501	0.5042		0.48	0.4958	0.4979	0.501	0.5042
WESQGGLLGVGESGF		495	509	0.2373	0.3013	0.3191		0.3201				0.3013	100	0.3201	100	100
LGVGESG		502	508	0.4437	0.5486	0.5719	0.5804	0.5782	0.5828	0.5792		0.5486	0.5804	0.5782	0.5828	0.5792
LGVGESGF	*	502	509	0.3705	0.4525	0.4666	0.4663	0.4738	0.4736	0.4714		0.4525	0.4663	0.4738	0.4736	0.4714
GVGESGF		503	509	0.4272	0.4603	0.4596	0.4593	0.4652	0.4702	0.4586		0.4603	0.4593	0.4652	0.4702	0.4586
LSLTNDDLNPNVRD		521	534	0.1273	0.1538	0.1691	0.179	0.191	0.2082	0.2246		0.1538	0.179	0.191	0.2082	0.2246
SLTNDDLNPNVRD		522	534	0.1396	0.1707	0.1775	0.1871	0.209	0.2284	0.2435		0.1707	0.1871	0.209	0.2284	0.2435
TNDDLNPNVRD		524	534	0.1454	0.1858	0.2096	0.2232	0.2401	0.2625	0.2839		0.1858	0.2232	0.2401	0.2625	0.2839
LSLTNDDLNPNVRDPIVKQ		521	539	0.2316	0.2996	0.3105	0.3145	0.3304	0.3419	0.3494		0.2996	0.3145	0.3304	0.3419	0.3494
LSLTNDDLNPNVRDPIVKQL	*	521	540	0.2101	0.285	0.3131	0.3268	0.3446	0.3626	0.3662		0.285	0.3268	0.3446	0.3626	0.3662
SLTNDDLNPNVRDPIVKQ		522	539	0.2383	0.309	0.3206	0.3258	0.3377	0.3563	0.3661		0.309	0.3258	0.3377	0.3563	0.3661
DLNPNVRD		527	534	0.1762	0.2612	0.2751	0.3065	0.3254	0.3634	0.3725		0.2612	0.3065	0.3254	0.3634	0.3725
SLTNDDLNPNVRDPIVKQL		522	540	0.2257	0.3013	0.3291	0.34	0.3626	0.3795	0.3892		0.3013	0.34	0.3626	0.3795	0.3892
SLTNDDLNPNVRDPIVKQLE		522	541	0.2582	0.3312	0.3606	0.3626	0.3878	0.405	0.4134		0.3312	0.3626	0.3878	0.405	0.4134
TNDDLNPNVRDPIVKQ		524	539	0.2478	0.3382	0.3501	0.3536	0.3806	0.3925	0.4042		0.3382	0.3536	0.3806	0.3925	0.4042
DLNPNVRDPIVKQ		527	539	0.2904	0.3959	0.4114	0.4222	0.4397	0.4593	0.4664		0.3959	0.4222	0.4397	0.4593	0.4664
DLNPNVRDPIVKQLE		527	541	0.3359	0.4312	0.473	0.4881	0.5138	0.5363	0.5415		0.4312	0.4881	0.5138	0.5363	0.5415
NPNVRDPIVKQ		529	539	0.3206	0.439	0.4542	0.4637	0.4852	0.5063	0.5105		0.439	0.4637	0.4852	0.5063	0.5105
PNVRDPIVKQ		530	539	0.3359	0.4537	0.4753	0.4795	0.498	0.519	0.5282		0.4537	0.4795	0.498	0.519	0.5282
PIVKQLE		535	541	0.4174	0.5821	0.6345	0.6617	0.6924	0.7134	0.7056		0.5821	0.6617	0.6924	0.7134	0.7056
EVSSGIKQ	*	541	548	0.2675	0.4465	0.5501	0.5588	0.5785	0.58	0.5858		0.4465	0.5588	0.5785	0.58	0.5858

## Sheet: mtClpX+ATP, ALAS-hxl 
(hydroxylamine-treated d34-ALAS + mtClpX + ATP) - (hydroxylamine-treated d34-ALAS + ATP)									uptake difference scale (Da)	0.49	0.51	1.01	1.51	2.1
Deuterium uptake difference of peptides (daltons): numbers displayed at left, corresponding heat map to the right										0	>0.5	>1.0	>1.5	>2.0
				time (min)						time (min)
sequence	linear	start	end	0.5	5	10	30	60		0.5	5	10	30	60
ATATGAGAA		35	43	0.0181	0.112	0.042	0.2909	0.1258		0.0181	0.112	0.042	0.2909	0.1258
ATATGAGAAAAT	*	35	46	0.0717	0.2355	0.0895	0.385	0.2365		0.0717	0.2355	0.0895	0.385	0.2365
ATGAGAAAATA		37	47	0.0613	0.1483	0.1136	0.2565	0.1241		0.0613	0.1483	0.1136	0.2565	0.1241
ATATGAGAAAATATASST		35	52	0.3536	0.3473	0.1405	0.5148	0.1521		0.3536	0.3473	0.1405	0.5148	0.1521
ATATGAGAAAATATASSTHAAA		35	56	0.3275	0.5437	0.3321	0.8353	0.151		0.3275	0.5437	0.3321	0.8353	0.151
ATATGAGAAAATATASSTHAAAA		35	57	0.3486	0.421	0.2155	0.7167	0.1324		0.3486	0.421	0.2155	0.7167	0.1324
ATATGAGAAAATATASSTHAAAAA		35	58	0.1863	0.392	0.0881	0.7695	0.0664		0.1863	0.392	0.0881	0.7695	0.0664
TATASSTHAAAAAAAAANHSTQESGF		46	71	0.2061	0.271	0.1528	0.5254	-0.1753		0.2061	0.271	0.1528	0.5254	-0.1753
ATASSTHAAAAAAAAANHSTQESGF	*	47	71	0.3584	0.3919	0.2463	0.45	-0.2363		0.3584	0.3919	0.2463	0.45	-0.2363
TASSTHAAAAAAAAANHSTQESGF		48	71	0.3138	0.2867	0.1694	0.4451	-0.1153		0.3138	0.2867	0.1694	0.4451	-0.1153
ASSTHAAAAAAAAANHSTQESGF		49	71	0.2986	0.3002	0.2142	0.4931	-0.1048		0.2986	0.3002	0.2142	0.4931	-0.1048
HAAAAAAAAANHSTQESGFD		53	72	0.3189	0.4789	0.1825	0.6415	-0.0491		0.3189	0.4789	0.1825	0.6415	-0.0491
AAAAAANHSTQESGF		57	71	0.1686	0.2607	0.1491	0.2892	0.0001		0.1686	0.2607	0.1491	0.2892	0.0001
AAAAAANHSTQESGFD		57	72	0.3232	0.2604	0.1379	0.3437	-0.0206		0.3232	0.2604	0.1379	0.3437	-0.0206
AAAAANHSTQESGF		58	71	0.1694	0.1805	0.0776	0.2288	-0.268		0.1694	0.1805	0.0776	0.2288	-0.268
AAAANHSTQESGF		59	71	0.2551	0.2283	0.1695	0.2346	-0.0908		0.2551	0.2283	0.1695	0.2346	-0.0908
AAANHSTQESGF		60	71	0.2498	0.208	0.1553	0.1924	-0.0678		0.2498	0.208	0.1553	0.1924	-0.0678
AANHSTQESGF		61	71	0.0594	0.1366	-0.0351	0.027	-0.2029		0.0594	0.1366	-0.0351	0.027	-0.2029
HSTQESGFD		64	72	0.0938	0.1416	0.1475	0.1534	0.0885		0.0938	0.1416	0.1475	0.1534	0.0885
DYEGLID		72	78	0.0178	0.2365	0.593	0.8152	0.982		0.0178	0.2365	0.593	0.8152	0.982
DYEGLIDSEL	*	72	81	0.0387	0.3568	0.8595	1.2527	1.5129		0.0387	0.3568	0.8595	1.2527	1.5129
YEGLIDSEL		73	81	0.0335	0.1745	0.8807	0.9654	1.3961		0.0335	0.1745	0.8807	0.9654	1.3961
EGLIDSEL		74	81	-0.0134	0.2319	0.7718	1.0573	1.3577		-0.0134	0.2319	0.7718	1.0573	1.3577
IDSELQKKRLDKS		77	89	0.037	0.0753	1.0224	1.0977	0.8418		0.037	0.0753	1.0224	1.0977	0.8418
ELQKKRLDKS		80	89	0.0117	0.1311	0.6908	0.5544	0.2452		0.0117	0.1311	0.6908	0.5544	0.2452
LQKKRLDKS		81	89	0.0243	0.1341	0.474	0.2849	-0.0532		0.0243	0.1341	0.474	0.2849	-0.0532
DYEGLIDSELQKKRLDKSYRYFNNINRL		72	99	0.0367	0.8097	2.5549	3.7298	4.5545		0.0367	0.8097	2.5549	3.7298	4.5545
QKKRLDKS	*	82	89	0.0229	0.0948	0.3225	0.2561	0.1163		0.0229	0.0948	0.3225	0.2561	0.1163
KKRLDKS		83	89	0.042	-0.0183	0.3581	0.2122	0.0979		0.042	-0.0183	0.3581	0.2122	0.0979
QKKRLDKSYRYFNNINRL		82	99	0.2424	0.6725	1.4265	1.9971	2.162		0.2424	0.6725	1.4265	1.9971	2.162
YRYFNNI		90	96	-0.0492	0.2381	0.3693	0.6096	0.6681		-0.0492	0.2381	0.3693	0.6096	0.6681
RYFNNINRL	*	91	99	0.0315	0.3791	0.9407	1.5423	1.6386		0.0315	0.3791	0.9407	1.5423	1.6386
YRYFNNINRLAKEFPLAHRQREAD		90	113	0.0475	0.7064	1.6983	2.9553	4.1108		0.0475	0.7064	1.6983	2.9553	4.1108
KEFPLAHRQREAD	*	101	113	0.189	0.2395	0.7027	0.9871	0.7611		0.189	0.2395	0.7027	0.9871	0.7611
FPLAHRQREAD		103	113	0.0227	0.3268	0.745	1.0568	0.8594		0.0227	0.3268	0.745	1.0568	0.8594
AKEFPLAHRQREADKVTV		100	117	0.1512	0.6787	1.3649	2.2991	2.6748		0.1512	0.6787	1.3649	2.2991	2.6748
FPLAHRQREADKVTVW		103	118	0.1029	0.7135	1.6945	2.8477	3.4113		0.1029	0.7135	1.6945	2.8477	3.4113
PLAHRQREADKVTVW		104	118	0.123	0.4034	1.368	2.4165	3.3109		0.123	0.4034	1.368	2.4165	3.3109
KVTVWCSND	*	114	122	0.087	0.2861	0.5979	0.9917	1.6322		0.087	0.2861	0.5979	0.9917	1.6322
KVTVWCSNDY		114	123	0.0078	0.175	0.5571	1.2727	2.0163		0.0078	0.175	0.5571	1.2727	2.0163
YLALSKHPEVL	*	123	133	0.001	0.1896	0.5529	1.357	2.2695		0.001	0.1896	0.5529	1.357	2.2695
LALSKHPEVL		124	133	0.0038	0.486	0.8407	1.5095	2.0895		0.0038	0.486	0.8407	1.5095	2.0895
DAMHKTID		134	141	0.0278	0.0752	0.4058	0.9104	1.354		0.0278	0.0752	0.4058	0.9104	1.354
DAMHKTIDKYGCG	*	134	146	0.0179	0.0964	0.9586	2.2875	3.7561		0.0179	0.0964	0.9586	2.2875	3.7561
HKTIDKYGCG		137	146	0.0439	0.1116	0.708	1.7844	2.8018		0.0439	0.1116	0.708	1.7844	2.8018
DAMHKTIDKYGCGAGGTRN		134	152	0.0423	0.3537	1.7826	3.3662	5.0091		0.0423	0.3537	1.7826	3.3662	5.0091
HKTIDKYGCGAGGTRN		137	152	0.0551	-0.0511	1.391	2.8262	3.7862		0.0551	-0.0511	1.391	2.8262	3.7862
DAMHKTIDKYGCGAGGTRNIAGHNIPTL		134	161	0.0431	0.9323	2.5631	4.8583	7.0334		0.0431	0.9323	2.5631	4.8583	7.0334
LATLHKKEGAL		167	177	0.0293	0.1113	0.0992	0.0939	0.0756		0.0293	0.1113	0.0992	0.0939	0.0756
TLHKKEGAL		169	177	0.0092	-0.0087	0.088		-0.0017		0.0092	-0.0087	0.088		-0.0017
ATLHKKEGALVF	*	168	179	0.0541	0.0997	0.1097	0.137	0.0732		0.0541	0.0997	0.1097	0.137	0.0732
HKKEGALVF		171	179	0.0521	0.0472	0.0295	-0.005	-0.0491		0.0521	0.0472	0.0295	-0.005	-0.0491
VANDAVL	*	184	190	0.0401	0.1341	0.321	0.8239	1.3454		0.0401	0.1341	0.321	0.8239	1.3454
SLLGQKMKD	*	191	199	0.0358	0.0923	0.3195	0.752	0.9254		0.0358	0.0923	0.3195	0.752	0.9254
LLGQKMKD		192	199	0.0513	0.151	0.3486	0.6824	0.7881		0.0513	0.151	0.3486	0.6824	0.7881
LVIFSDELNHASM	*	200	212	0.0354	0.1683	0.4459	0.9407	1.2689		0.0354	0.1683	0.4459	0.9407	1.2689
VIFSDELNHASM		201	212	0.032	0.2446	0.5371	1.0422	1.5943		0.032	0.2446	0.5371	1.0422	1.5943
FSDELNHASM		203	212	0.0128	0.1539	0.3983	0.9739	1.4194		0.0128	0.1539	0.3983	0.9739	1.4194
SDELNHASM		204	212	0.0391	0.1251	0.4202	1.0193	1.4941		0.0391	0.1251	0.4202	1.0193	1.4941
LEQLLQSYPKSVPKL		234	248	0.1172	-0.0183	0.0731	0.1582	0.0615		0.1172	-0.0183	0.0731	0.1582	0.0615
EQLLQSYPKSVPKL		235	248	0.0454	-0.0569	0.0141	0.1056	0.0702		0.0454	-0.0569	0.0141	0.1056	0.0702
LEQLLQSYPKSVPKLIA	*	234	250	0.1193	0.1554	0.1415	0.1588	0.0975		0.1193	0.1554	0.1415	0.1588	0.0975
EQLLQSYPKSVPKLIA		235	250	0.0485	-0.0754	0.0763	-0.0203	-0.0769		0.0485	-0.0754	0.0763	-0.0203	-0.0769
LLQSYPKSVPKL		237	248	0.1054	-0.0339	-0.0338	0.0629	-0.0705		0.1054	-0.0339	-0.0338	0.0629	-0.0705
LLQSYPKSVPKLIA		237	250	0.0954	0.0468	0.1055	0.2078	-0.0418		0.0954	0.0468	0.1055	0.2078	-0.0418
QSYPKSVPKLIA		239	250	0.0866	0.0755	0.0384	0.1413	0.0929		0.0866	0.0755	0.0384	0.1413	0.0929
YPKSVPKL		241	248	0.0724	0.0182	0.0794	0.1001	0.1052		0.0724	0.0182	0.0794	0.1001	0.1052
YSMAGSV	*	255	261	0.0786	0.0587	0.1384	0.2727	0.0416		0.0786	0.0587	0.1384	0.2727	0.0416
YSMAGSVA		255	262	0.0504	0.0186	0.1638	0.2497	0.0981		0.0504	0.0186	0.1638	0.2497	0.0981
YSMAGSVAD		255	263	0.0814	0.0738	0.2202	0.3056	0.1849		0.0814	0.0738	0.2202	0.3056	0.1849
YSMAGSVADI		255	264	0.0193	0.0679	0.1947	0.1307	0.0469		0.0193	0.0679	0.1947	0.1307	0.0469
YSMAGSVADIE		255	265	0.0653	0.0777	0.2594	0.2663	0.3452		0.0653	0.0777	0.2594	0.2663	0.3452
GSVADIE		259	265	0.0389	0.0667	0.0758	0.1123	0.0018		0.0389	0.0667	0.0758	0.1123	0.0018
ADIEKICDL	*	262	270	0.0587	0.0039	0.0822	0.029	0.0542		0.0587	0.0039	0.0822	0.029	0.0542
DIEKICD		263	269	0.0341	0.0487	0.0647	0.0841	0.0288		0.0341	0.0487	0.0647	0.0841	0.0288
LADKYGAL		270	277	0.0147	0.0307	0.0341	0.0104	-0.0786		0.0147	0.0307	0.0341	0.0104	-0.0786
LADKYGALT		270	278	-0.0309	-0.0577	0.0485	-0.0317	-0.1262		-0.0309	-0.0577	0.0485	-0.0317	-0.1262
ADKYGAL		271	277	-0.0009	-0.057	0.0154	0.0399	0.003		-0.0009	-0.057	0.0154	0.0399	0.003
ADKYGALTF	*	271	279	0.0088	0.074	0.0593	0.0932	-0.0426		0.0088	0.074	0.0593	0.0932	-0.0426
TFLDEVHAVGL		278	288	-0.0112	0.0242	0.051	-0.0053	0.0524		-0.0112	0.0242	0.051	-0.0053	0.0524
LDEVHAVGL	*	280	288	0.0366	-0.0485	0.0542	0.079	0.0461		0.0366	-0.0485	0.0542	0.079	0.0461
DEVHAVGLYGPHGAG		281	295	-0.0399	0.1006	0.0177	-0.0474	-0.0375		-0.0399	0.1006	0.0177	-0.0474	-0.0375
LDEVHAVGLYGPHGAGVAE		280	298	0.012	-0.0007	0.0523	-0.0124	-0.0327		0.012	-0.0007	0.0523	-0.0124	-0.0327
DEVHAVGLYGPHGAGVAE		281	298	0.0307	-0.0202	0.0705	-0.009	-0.043		0.0307	-0.0202	0.0705	-0.009	-0.043
VGLYGPHGAGVAE		286	298	0.0668	-0.0306	0.0619	0.0393	0.025		0.0668	-0.0306	0.0619	0.0393	0.025
YGPHGAG		289	295	-0.0031	-0.0182	0.036	0.0372	-0.0842		-0.0031	-0.0182	0.036	0.0372	-0.0842
LYGPHGAGVAE		288	298	0.0589	0.0297	0.0698	-0.0024	-0.1252		0.0589	0.0297	0.0698	-0.0024	-0.1252
YGPHGAGVAEHCDF	*	289	302	0.0164	0.0063	-0.0062	0.0234	-0.0113		0.0164	0.0063	-0.0062	0.0234	-0.0113
VAEHCDF		296	302	-0.0875	-0.0819	-0.0513	-0.0609	-0.1155		-0.0875	-0.0819	-0.0513	-0.0609	-0.1155
ESHRASGIAT		303	312	0.0473	-0.1175	0.0462	-0.0684	-0.0517		0.0473	-0.1175	0.0462	-0.0684	-0.0517
ESHRASGIATPKTNDKGGAKTVMD	*	303	326	0.107	0.1953	0.1633	0.188	-0.3019		0.107	0.1953	0.1633	0.188	-0.3019
IATPKTNDKGGAKTVM		310	325	0.0446	0.2526	0.1571	0.2547	-0.1599		0.0446	0.2526	0.1571	0.2547	-0.1599
IATPKTNDKGGAKTVMD		310	326	0.1985	0.1717	0.1499	0.2509	-0.1079		0.1985	0.1717	0.1499	0.2509	-0.1079
ATPKTNDKGGAKTVM		311	325	0.1062	0.1275	-0.0148	0.1108	-0.4003		0.1062	0.1275	-0.0148	0.1108	-0.4003
DRVDMIT		326	332	-0.0058	-0.0596	-0.009	0.0036	-0.0439		-0.0058	-0.0596	-0.009	0.0036	-0.0439
DRVDMITGTLG	*	326	336	-0.0007	0.1139	0.1443	0.3693	0.627		-0.0007	0.1139	0.1443	0.3693	0.627
DRVDMITGTLGKSFGSVGG		326	344	0.0039	0.3049	0.942	2.4938	4.2764		0.0039	0.3049	0.942	2.4938	4.2764
ITGTLGKSF		331	339	-0.0038	0.1674	0.4732	1.3937	2.2774		-0.0038	0.1674	0.4732	1.3937	2.2774
DRVDMITGTLGKSFGSVGGY		326	345	-0.0114	0.2388	0.9905	2.5839	4.3896		-0.0114	0.2388	0.9905	2.5839	4.3896
RVDMITGTLGKSFGSVGG		327	344	-0.0593	0.1438	0.8962	2.6392	4.4466		-0.0593	0.1438	0.8962	2.6392	4.4466
RVDMITGTLGKSFGSVGGY		327	345	0.0771	0.2589	1.0783	2.5729	4.3272		0.0771	0.2589	1.0783	2.5729	4.3272
DRVDMITGTLGKSFGSVGGYVAA		326	348	0.006	0.3235	0.8973	2.1342	3.9286		0.006	0.3235	0.8973	2.1342	3.9286
MITGTLGKSFGSVGGY		330	345	0.0566	0.2037	0.8929	2.1918	3.8008		0.0566	0.2037	0.8929	2.1918	3.8008
ITGTLGKSFGSVGGY		331	345	0.0305	0.2312	0.8489	1.9521	3.3212		0.0305	0.2312	0.8489	1.9521	3.3212
GTLGKSFGSVGG		333	344	0.0067	0.3106	1.0343	2.015	3.0865		0.0067	0.3106	1.0343	2.015	3.0865
MITGTLGKSFGSVGGYVAA		330	348	0.0412	0.3037	0.8326	2.0745	3.5696		0.0412	0.3037	0.8326	2.0745	3.5696
ITGTLGKSFGSVGGYVAA		331	348	0.0575	0.2425	0.9344	1.9964	3.1103		0.0575	0.2425	0.9344	1.9964	3.1103
DRVDMITGTLGKSFGSVGGYVAASRKLIDW		326	355	0.0456	0.1019	1.0302	2.5479	3.9701		0.0456	0.1019	1.0302	2.5479	3.9701
GKSFGSVGGYVAA	*	336	348	0.0023	0.0557	0.5505	1.25	2.0224		0.0023	0.0557	0.5505	1.25	2.0224
FGSVGGY		339	345	0.0044	0.071	0.2892	0.6882	1.1122		0.0044	0.071	0.2892	0.6882	1.1122
ITGTLGKSFGSVGGYVAASRKLIDW		331	355	0.0809	0.3197	1.0323	1.9681	3.5423		0.0809	0.3197	1.0323	1.9681	3.5423
GTLGKSFGSVGGYVAASRKLIDW		333	355	0.0842	0.2163	0.8892	1.8903	2.8309		0.0842	0.2163	0.8892	1.8903	2.8309
GKSFGSVGGYVAASRKLIDW		336	355	0.0069	0.1806	0.3787	1.033	1.5664		0.0069	0.1806	0.3787	1.033	1.5664
YVAASRKLIDW		345	355	-0.0004	-0.0525	0.0754	0.1902	0.1432		-0.0004	-0.0525	0.0754	0.1902	0.1432
VAASRKLIDWF		346	356	0.0601	0.1068	0.1701	0.2837	0.1744		0.0601	0.1068	0.1701	0.2837	0.1744
AASRKLIDW		347	355	0.0364	0.0403	0.1612	0.1733	0.1323		0.0364	0.0403	0.1612	0.1733	0.1323
ASRKLIDW		348	355	0.0325	-0.0977	0.042	0.0293	0.0507		0.0325	-0.0977	0.042	0.0293	0.0507
SRKLIDWF	*	349	356	0.0331	0.0584	0.0571	0.1251	0.1268		0.0331	0.0584	0.0571	0.1251	0.1268
FRSFAPGF	*	356	363	0.0265	0.1184	0.6737	1.2186	1.7717		0.0265	0.1184	0.6737	1.2186	1.7717
RSFAPGF		357	363	-0.0083	0.1684	0.4268	1.08	1.4128		-0.0083	0.1684	0.4268	1.08	1.4128
IFTTTLPPSVM	*	364	374	0.0064	0.3527	1.0536	1.8007	2.7255		0.0064	0.3527	1.0536	1.8007	2.7255
FTTTLPPSVM		365	374	0.0317	0.1045	0.5956	1.7283	3.2306		0.0317	0.1045	0.5956	1.7283	3.2306
TTTLPPSVM		366	374	0.0302	0.1582	0.6204	1.3417	2.1813		0.0302	0.1582	0.6204	1.3417	2.1813
TTLPPSVM		367	374	-0.0137	0.1626	0.4675	1.0143	1.7236		-0.0137	0.1626	0.4675	1.0143	1.7236
MAGATAA	*	374	380	0.0402	0.0048	0.122	0.3257	0.5345		0.0402	0.0048	0.122	0.3257	0.5345
AGATAAIRYQRCHIDL		375	390	-0.0296	0.0539	0.0756	0.3481	0.4267		-0.0296	0.0539	0.0756	0.3481	0.4267
AAIRYQRC		379	386	0.0256	0.0159	0.0396	0.0176	0.0012		0.0256	0.0159	0.0396	0.0176	0.0012
IRYQRCHIDL	*	381	390	0.007	0.0239	0.1048	0.1674	0.2512		0.007	0.0239	0.1048	0.1674	0.2512
HIDLRTSQQKHTM		387	399	-0.0063	0.099	0.2039	0.441	0.4968		-0.0063	0.099	0.2039	0.441	0.4968
HIDLRTSQQKHTMY		387	400	0.0143	0.0832	0.1963	0.3376	0.4206		0.0143	0.0832	0.1963	0.3376	0.4206
YVKKAFHELGIPVIPNPSHIVPVL	*	400	423	0.1249	0.2358	0.2546	0.3552	0.2772		0.1249	0.2358	0.2546	0.3552	0.2772
HELGIPVIPNPSHIVPVL		406	423	0.07	0.0164	0.1129	0.2904	0.2223		0.07	0.0164	0.1129	0.2904	0.2223
LGIPVIPNPSHIVPVL		408	423	0.0749	-0.0146	0.0992	0.175	0.1864		0.0749	-0.0146	0.0992	0.175	0.1864
IPVIPNPSHIVPVL		410	423	0.0392	0.0233	0.1028	0.143	0.1623		0.0392	0.0233	0.1028	0.143	0.1623
PNPSHIVPVL		414	423	0.0767	-0.0155	0.0641	0.1796	0.2243		0.0767	-0.0155	0.0641	0.1796	0.2243
LAKQASDIL	*	429	437	-0.0044	-0.0075	0.0191	-0.009	0.0063		-0.0044	-0.0075	0.0191	-0.009	0.0063
AKQASDIL		430	437	0.0462	-0.0703	0.0194	0.0049	-0.0263		0.0462	-0.0703	0.0194	0.0049	-0.0263
ILINKHQIYVQ		436	446	0.0032	0.017	0.212	0.2723	0.2089		0.0032	0.017	0.212	0.2723	0.2089
INKHQIY		438	444	-0.0186	-0.0187	0.0827	0.1802	0.1651		-0.0186	-0.0187	0.0827	0.1802	0.1651
ILINKHQIYVQA		436	447	0.0381	0.085	0.2373	0.3631	0.2888		0.0381	0.085	0.2373	0.3631	0.2888
INKHQIYVQ	*	438	446	0.0062	-0.0053	0.1825	0.2652	0.1947		0.0062	-0.0053	0.1825	0.2652	0.1947
INFPTVA		448	454	0.0057	0.073	0.1011	0.0993	0.0576		0.0057	0.073	0.1011	0.0993	0.0576
AINFPTVARGTERL	*	447	460	0.0217	0.1167	0.14	0.1741	-0.0878		0.0217	0.1167	0.14	0.1741	-0.0878
PTVARGTERL		451	460	-0.1121	-0.1148	-0.0098	-0.0281	-0.1702		-0.1121	-0.1148	-0.0098	-0.0281	-0.1702
TVARGTERL		452	460	-0.0439	-0.0501	-0.005	-0.0396	-0.2181		-0.0439	-0.0501	-0.005	-0.0396	-0.2181
RITPTPGHTND		461	471	0.0132	0.1872	0.3201	0.5718	0.7423		0.0132	0.1872	0.3201	0.5718	0.7423
RITPTPGHTNDL		461	472	0.0717	0.2634	0.3977	0.8191	0.878		0.0717	0.2634	0.3977	0.8191	0.878
RITPTPGHTNDLSD	*	461	474	0.0014	0.3196	0.715	1.04	0.9664		0.0014	0.3196	0.715	1.04	0.9664
RITPTPGHTNDLSDIL		461	476	0.0491	0.2467	0.5495	1.1935	1.8263		0.0491	0.2467	0.5495	1.1935	1.8263
PGHTNDL		466	472	0.0277	0.0412	0.1452	0.3558	0.314		0.0277	0.0412	0.1452	0.3558	0.314
ILINAVD		475	481	-0.0185	-0.0272	-0.0096	-0.0413	-0.0164		-0.0185	-0.0272	-0.0096	-0.0413	-0.0164
ILINAVDDVF	*	475	484	0.0043	-0.0377	-0.0261	0.0037	-0.0496		0.0043	-0.0377	-0.0261	0.0037	-0.0496
VDDVFNE		480	486	-0.0152	-0.0066	0.0004	-0.0253	-0.0105		-0.0152	-0.0066	0.0004	-0.0253	-0.0105
LQLPRVRD		487	494	0.0345	0.0094	-0.0487	-0.0866	-0.2745		0.0345	0.0094	-0.0487	-0.0866	-0.2745
NELQLPRVRDWESQGGL	*	485	501	0.028	0.0453	0.0367	0.0409	-0.1801		0.028	0.0453	0.0367	0.0409	-0.1801
LQLPRVRDWESQGGL		487	501	0.0871	0.078	0.0916	0.0573	-0.1377		0.0871	0.078	0.0916	0.0573	-0.1377
PRVRDWESQGGLL		490	502	0.0157	0.1073	0.056	0.0996	-0.0868		0.0157	0.1073	0.056	0.0996	-0.0868
NELQLPRVRDWESQGGLLGVGESGF		485	509	0.1691	0.3363	0.0462	0.2386	-0.2215		0.1691	0.3363	0.0462	0.2386	-0.2215
LQLPRVRDWESQGGLLGVGESGF		487	509	0.0733	0.1279	0.2006	0.263	-0.2937		0.0733	0.1279	0.2006	0.263	-0.2937
WESQGGL		495	501	0.0652	0.0887	0.0637	0.1062	-0.0836		0.0652	0.0887	0.0637	0.1062	-0.0836
PRVRDWESQGGLLGVGESG		490	508	0.0263	0.3538	0.1502	0.2056	-0.1228		0.0263	0.3538	0.1502	0.2056	-0.1228
WESQGGLLG		495	503	0.0197	0.1157	0.078	0.1	-0.1208		0.0197	0.1157	0.078	0.1	-0.1208
PRVRDWESQGGLLGVGESGF		490	509	-0.1501	0.1987	0.1714	0.2791	0.0364		-0.1501	0.1987	0.1714	0.2791	0.0364
WESQGGLLGVG		495	505	0.0802	0.0701	0.0373	0.1633	-0.0207		0.0802	0.0701	0.0373	0.1633	-0.0207
WESQGGLLGVGESG		495	508	-0.0021	0.1538	0.1109	0.1983	-0.1944		-0.0021	0.1538	0.1109	0.1983	-0.1944
LGVGESG		502	508	0.0287	0.0604	0.0477	0.1075	-0.0045		0.0287	0.0604	0.0477	0.1075	-0.0045
LGVGESGF	*	502	509	0.0806	0.1168	0.0901	0.1346	-0.1023		0.0806	0.1168	0.0901	0.1346	-0.1023
GVGESGF		503	509	0.0769	0.1274	0.0931	0.1046	-0.087		0.0769	0.1274	0.0931	0.1046	-0.087
LSLTNDDLNPNVRD		521	534	0.0622	0.0874	0.2199	0.4914	0.5719		0.0622	0.0874	0.2199	0.4914	0.5719
SLTNDDLNPNVRD		522	534	0.1057	0.1576	0.2519	0.5445	0.5506		0.1057	0.1576	0.2519	0.5445	0.5506
TNDDLNPNVRD		524	534	0.0433	0.1085	0.2236	0.4924	0.7222		0.0433	0.1085	0.2236	0.4924	0.7222
LSLTNDDLNPNVRDPIVKQ		521	539	0.108	0.1888	0.2621	0.6628	0.6234		0.108	0.1888	0.2621	0.6628	0.6234
LSLTNDDLNPNVRDPIVKQL	*	521	540	0.116	0.3406	0.3925	0.6222	0.6632		0.116	0.3406	0.3925	0.6222	0.6632
SLTNDDLNPNVRDPIVKQ		522	539	0.1575	0.1837	0.2717	0.607	0.5939		0.1575	0.1837	0.2717	0.607	0.5939
DLNPNVRD		527	534	0.0048	0.2064	0.1159	0.3895	0.5569		0.0048	0.2064	0.1159	0.3895	0.5569
SLTNDDLNPNVRDPIVKQL		522	540	0.0798	-0.0121	0.2532	0.6014	0.5596		0.0798	-0.0121	0.2532	0.6014	0.5596
SLTNDDLNPNVRDPIVKQLE		522	541	0.0126	0.1795	0.337	0.6656	0.6525		0.0126	0.1795	0.337	0.6656	0.6525
TNDDLNPNVRDPIVKQ		524	539	0.1047	0.1698	0.1543	0.6568	0.6294		0.1047	0.1698	0.1543	0.6568	0.6294
DLNPNVRDPIVKQ		527	539	0.0677	0.1194	0.232	0.5292	0.6103		0.0677	0.1194	0.232	0.5292	0.6103
NPNVRDPIVKQ		529	539	0.0967	0.2048	0.2441	0.562	0.6003		0.0967	0.2048	0.2441	0.562	0.6003
PNVRDPIVKQ		530	539	0.0887	0.0903	0.207	0.4399	0.6184		0.0887	0.0903	0.207	0.4399	0.6184
PIVKQLE		535	541	0.1601	0.2711	0.226	0.2749	0.147		0.1601	0.2711	0.226	0.2749	0.147
EVSSGIKQ	*	541	548	0.0087	0.0158	0.056	0.0307	0.0658		0.0087	0.0158	0.056	0.0307	0.0658

## Sheet: mtClpX no ATP, ALAS-hxl
(hydroxylamine-treated d34-ALAS + mtClpX) - (hydroxylamine-treated d34-ALAS)									uptake difference scale (Da)	0.49	0.51	1.01	1.51	2.1
Deuterium uptake difference of peptides (daltons): numbers displayed at left, corresponding heat map to the right										0	>0.5	>1.0	>1.5	>2.0
				time (min)							time (min)
sequence	linear	start	end	0.5	5	10	30	60		0.5	5	10	30	60
ATATGAGAA		35	43	-0.0381	0.1829	0.0235	0.1033	0.071		-0.0381	0.1829	0.0235	0.1033	0.071
ATATGAGAAAAT	*	35	46	-0.0691	0.3183	0.0966	0.0266	0.3353		-0.0691	0.3183	0.0966	0.0266	0.3353
ATGAGAAAATA		37	47	-0.061	0.1632	0.0368	-0.019	0.2411		-0.061	0.1632	0.0368	-0.019	0.2411
ATATGAGAAAATATASST		35	52	0.1081	0.3214	0.145	0.0317	0.4091		0.1081	0.3214	0.145	0.0317	0.4091
ATATGAGAAAATATASSTHAAA		35	56	0.1154	0.4682	0.2891	0.2478	0.5656		0.1154	0.4682	0.2891	0.2478	0.5656
ATATGAGAAAATATASSTHAAAA		35	57	0.0039	0.5636	0.2187	0.1964	0.5844		0.0039	0.5636	0.2187	0.1964	0.5844
ATATGAGAAAATATASSTHAAAAA		35	58	-0.0736	0.5042	0.1476	0.1328	0.4557		-0.0736	0.5042	0.1476	0.1328	0.4557
TATASSTHAAAAAAAAANHSTQESGF		46	71	-0.074	0.3807	0.1402	0.0317	0.2343		-0.074	0.3807	0.1402	0.0317	0.2343
ATASSTHAAAAAAAAANHSTQESGF	*	47	71	-0.0344	0.3253	0.0611	-0.0508	0.2063		-0.0344	0.3253	0.0611	-0.0508	0.2063
TASSTHAAAAAAAAANHSTQESGF		48	71	-0.0262	0.3603	0.1102	0.1215	0.3221		-0.0262	0.3603	0.1102	0.1215	0.3221
ASSTHAAAAAAAAANHSTQESGF		49	71	-0.0369	0.4049	0.1876	-0.0087	0.3206		-0.0369	0.4049	0.1876	-0.0087	0.3206
HAAAAAAAAANHSTQESGFD		53	72	0.0689	0.396	0.1151	0.153	0.3488		0.0689	0.396	0.1151	0.153	0.3488
AAAAAANHSTQESGF		57	71	-0.0095	0.2563	0.1155	0.028	0.1361		-0.0095	0.2563	0.1155	0.028	0.1361
AAAAAANHSTQESGFD		57	72	-0.0351	0.1976	0.1218	-0.0439	0.1307		-0.0351	0.1976	0.1218	-0.0439	0.1307
AAAAANHSTQESGF		58	71	-0.0738	0.1644	0.0361	-0.0463	0.0853		-0.0738	0.1644	0.0361	-0.0463	0.0853
AAAANHSTQESGF		59	71	0.0023	0.188	0.1173	0.0802	0.1146		0.0023	0.188	0.1173	0.0802	0.1146
AAANHSTQESGF		60	71	-0.0489	0.1689	0.041	0.0554	0.096		-0.0489	0.1689	0.041	0.0554	0.096
AANHSTQESGF		61	71	-0.0628	0.0757	0.001	0.0395	0.112		-0.0628	0.0757	0.001	0.0395	0.112
HSTQESGFD		64	72	0.0663	0.0899	0.0193	-0.075	0.1006		0.0663	0.0899	0.0193	-0.075	0.1006
DYEGLID		72	78	-0.0377	-0.0127	-0.0889	-0.1032	-0.0446		-0.0377	-0.0127	-0.0889	-0.1032	-0.0446
DYEGLIDSEL	*	72	81	-0.0405	-0.0943	-0.232	-0.1235	-0.0521		-0.0405	-0.0943	-0.232	-0.1235	-0.0521
YEGLIDSEL		73	81	0.0338		-0.0582	-0.3635	-0.0943		0.0338	100	-0.0582	-0.3635	-0.0943
EGLIDSEL		74	81	-0.0416	-0.0919	-0.1449	-0.1505	-0.0546		-0.0416	-0.0919	-0.1449	-0.1505	-0.0546
IDSELQKKRLDKS		77	89	0.0321	-0.0729	-0.2543	-0.1471	-0.0141		0.0321	-0.0729	-0.2543	-0.1471	-0.0141
ELQKKRLDKS		80	89	-0.096	-0.0254	-0.2864	-0.1182	-0.1112		-0.096	-0.0254	-0.2864	-0.1182	-0.1112
LQKKRLDKS		81	89	-0.1082	-0.0349	-0.1869	-0.0642	-0.0506		-0.1082	-0.0349	-0.1869	-0.0642	-0.0506
DYEGLIDSELQKKRLDKSYRYFNNINRL		72	99	-0.1049	0.0557	-0.384	-0.3286	0.0138		-0.1049	0.0557	-0.384	-0.3286	0.0138
QKKRLDKS	*	82	89	-0.0447	0.0384	-0.0802	0.0811	0.0924		-0.0447	0.0384	-0.0802	0.0811	0.0924
KKRLDKS		83	89	0.0337	0.0161	-0.1605	-0.1034	-0.0034		0.0337	0.0161	-0.1605	-0.1034	-0.0034
QKKRLDKSYRY		82	92	-0.0996	0.1067	-0.0472	0.0288	0.176		-0.0996	0.1067	-0.0472	0.0288	0.176
QKKRLDKSYRYFNNINRL		82	99	-0.1188	0.1719	-0.0923	0.0856	-0.0971		-0.1188	0.1719	-0.0923	0.0856	-0.0971
YRYFNNI		90	96	-0.009	0.0629	0.0006	0.0236	0.0469		-0.009	0.0629	0.0006	0.0236	0.0469
RYFNNINRL	*	91	99	-0.1186	-0.0319	-0.0971	-0.1155	-0.1519		-0.1186	-0.0319	-0.0971	-0.1155	-0.1519
YRYFNNINRLAKEFPLAHRQREAD		90	113	-0.1029	0.2085	0.0262	-0.016	0.0049		-0.1029	0.2085	0.0262	-0.016	0.0049
KEFPLAHRQREAD	*	101	113	0.0941	0.0831	-0.0295	-0.1119	-0.1183		0.0941	0.0831	-0.0295	-0.1119	-0.1183
FPLAHRQREAD		103	113	-0.044	0.0211	0.0657	-0.1064	0.0076		-0.044	0.0211	0.0657	-0.1064	0.0076
AKEFPLAHRQREADKVTV		100	117	-0.0235	0.0582	-0.0638	-0.061	-0.082		-0.0235	0.0582	-0.0638	-0.061	-0.082
FPLAHRQREADKVTVW		103	118	-0.0283	0.0599	0.0269	0.0075	-0.0553		-0.0283	0.0599	0.0269	0.0075	-0.0553
PLAHRQREADKVTVW		104	118	0.0288	0.0792	-0.092	0.0269	0.0202		0.0288	0.0792	-0.092	0.0269	0.0202
KVTVWCSND	*	114	122	-0.0146	0.0288	-0.0477	-0.0822	-0.0918		-0.0146	0.0288	-0.0477	-0.0822	-0.0918
KVTVWCSNDY		114	123	-0.0401	-0.0808	0.0122	-0.0779	-0.1333		-0.0401	-0.0808	0.0122	-0.0779	-0.1333
YLALSKHPEVL	*	123	133	-0.0389	-0.126	-0.063	-0.041	-0.1369		-0.0389	-0.126	-0.063	-0.041	-0.1369
LALSKHPEVL		124	133	-0.0674	-0.0551	0.2793	0.0997	-0.1153		-0.0674	-0.0551	0.2793	0.0997	-0.1153
DAMHKTID		134	141	0.0337	0.0002	0.0205	0.0848	0.0086		0.0337	0.0002	0.0205	0.0848	0.0086
DAMHKTIDKYGCG	*	134	146	0.0257	-0.018	-0.0139	0.0941	-0.0269		0.0257	-0.018	-0.0139	0.0941	-0.0269
HKTIDKYGCG		137	146	0.011	-0.0299	0.018	-0.035	-0.0993		0.011	-0.0299	0.018	-0.035	-0.0993
DAMHKTIDKYGCGAGGTRN		134	152	-0.048	-0.0292	-0.1154	-0.115	-0.2541		-0.048	-0.0292	-0.1154	-0.115	-0.2541
HKTIDKYGCGAGGTRN		137	152	-0.0807	-0.0625	-0.1576	-0.0337	-0.0328		-0.0807	-0.0625	-0.1576	-0.0337	-0.0328
DAMHKTIDKYGCGAGGTRNIAGHNIPTL		134	161	-0.0117	0.0453	-0.118	-0.0998	-0.2823		-0.0117	0.0453	-0.118	-0.0998	-0.2823
LATLHKKEGAL		167	177	0.0177	0.0658	0.0044	0.0372	0.0349		0.0177	0.0658	0.0044	0.0372	0.0349
TLHKKEGAL		169	177	-0.0961	0.0288	-0.0043	0.0106	-0.0334		-0.0961	0.0288	-0.0043	0.0106	-0.0334
ATLHKKEGALVF	*	168	179	0.0458	0.017	0.0191	-0.0044	-0.0135		0.0458	0.017	0.0191	-0.0044	-0.0135
HKKEGALVF		171	179	-0.0159	-0.017	-0.0155	-0.0026	-0.0104		-0.0159	-0.017	-0.0155	-0.0026	-0.0104
VANDAVL	*	184	190	0.0501	0.048	0.0387	0.0576	0.073		0.0501	0.048	0.0387	0.0576	0.073
SLLGQKMKD	*	191	199	-0.0504	0.0153	-0.0534	-0.1131	-0.1688		-0.0504	0.0153	-0.0534	-0.1131	-0.1688
LLGQKMKD		192	199	0.0384	0.022	-0.0247	-0.0543	0.0005		0.0384	0.022	-0.0247	-0.0543	0.0005
LVIFSDELNHASM	*	200	212	0.0012	-0.1001	-0.0363	-0.0627	-0.1034		0.0012	-0.1001	-0.0363	-0.0627	-0.1034
VIFSDELNHASM		201	212	0.0062	0.0216	-0.018	-0.0353	-0.0473		0.0062	0.0216	-0.018	-0.0353	-0.0473
FSDELNHASM		203	212	-0.0164	0.0373	-0.0151	0.0566	0.019		-0.0164	0.0373	-0.0151	0.0566	0.019
SDELNHASM		204	212	0.0636	0.0344	0.0199	0.0284	-0.0566		0.0636	0.0344	0.0199	0.0284	-0.0566
LEQLLQSYPKSVPKL		234	248	-0.0427	0.0369	-0.0174	-0.0496	-0.0382		-0.0427	0.0369	-0.0174	-0.0496	-0.0382
EQLLQSYPKSVPKL		235	248	0.0275	0.0906	0.0527	0.0412	0.0312		0.0275	0.0906	0.0527	0.0412	0.0312
LEQLLQSYPKSVPKLIA	*	234	250	-0.0004	0.0321	0.0489	-0.0002	-0.018		-0.0004	0.0321	0.0489	-0.0002	-0.018
EQLLQSYPKSVPKLIA		235	250	-0.0184	0.0735	-0.0302	-0.0583	-0.0767		-0.0184	0.0735	-0.0302	-0.0583	-0.0767
LLQSYPKSVPKL		237	248	0.0177	0.0947	-0.0792	-0.0241	-0.2177		0.0177	0.0947	-0.0792	-0.0241	-0.2177
LLQSYPKSVPKLIA		237	250	-0.0632	-0.0022	-0.0356	-0.09	-0.1171		-0.0632	-0.0022	-0.0356	-0.09	-0.1171
QSYPKSVPKL		239	248	-0.0004	0.0356	0.0246	-0.0186	-0.0253		-0.0004	0.0356	0.0246	-0.0186	-0.0253
QSYPKSVPKLIA		239	250	-0.0447	0.048	-0.0156	-0.0132	0.0113		-0.0447	0.048	-0.0156	-0.0132	0.0113
YPKSVPKL		241	248	0.0194	0.0487	0.0251	0.0127	0.0295		0.0194	0.0487	0.0251	0.0127	0.0295
YSMAGSV	*	255	261	0.0378	0.0265	-0.0419	-0.0231	0.0155		0.0378	0.0265	-0.0419	-0.0231	0.0155
YSMAGSVA		255	262	0.0151	0.0678	-0.0304	0.0074	0.0579		0.0151	0.0678	-0.0304	0.0074	0.0579
YSMAGSVAD		255	263	-0.0298	0.0567	-0.0265	-0.0615	0.0137		-0.0298	0.0567	-0.0265	-0.0615	0.0137
YSMAGSVADI		255	264	-0.0761	-0.0115	-0.077	-0.1334	-0.0608		-0.0761	-0.0115	-0.077	-0.1334	-0.0608
YSMAGSVADIE		255	265	-0.0527	-0.0276	-0.0014	-0.0507	-0.0149		-0.0527	-0.0276	-0.0014	-0.0507	-0.0149
GSVADIE		259	265	0.0449	0.1127	0.0488	0.0908	0.0567		0.0449	0.1127	0.0488	0.0908	0.0567
ADIEKICDL	*	262	270	0.0396	0.0324	-0.0233	-0.0085	0.0034		0.0396	0.0324	-0.0233	-0.0085	0.0034
DIEKICD		263	269	-0.0107	0.0569	-0.0173	0.0158	-0.0075		-0.0107	0.0569	-0.0173	0.0158	-0.0075
LADKYGAL		270	277	-0.0309	0.0113	-0.0113	-0.0336	-0.0493		-0.0309	0.0113	-0.0113	-0.0336	-0.0493
LADKYGALT		270	278	-0.0257	-0.0471	0.0112	-0.0202	-0.1042		-0.0257	-0.0471	0.0112	-0.0202	-0.1042
ADKYGAL		271	277	-0.0055	0.0381	0.0074	0.0257	0.0099		-0.0055	0.0381	0.0074	0.0257	0.0099
ADKYGALTF	*	271	279	-0.0576	-0.0474	-0.0092	0.001	-0.0443		-0.0576	-0.0474	-0.0092	0.001	-0.0443
TFLDEVHAVGL		278	288	-0.0444	-0.0833	-0.0665	-0.0016	-0.0637		-0.0444	-0.0833	-0.0665	-0.0016	-0.0637
LDEVHAVGL	*	280	288	0.0265	-0.0018	-0.0225	0.0159	-0.0134		0.0265	-0.0018	-0.0225	0.0159	-0.0134
DEVHAVGLYGPHGAG		281	295	0.0764	-0.0286	0.0242	-0.0192			0.0764	-0.0286	0.0242	-0.0192	100
LDEVHAVGLYGPHGAGVAE		280	298	0.0369	-0.0203	-0.0261	-0.0391	-0.0984		0.0369	-0.0203	-0.0261	-0.0391	-0.0984
DEVHAVGLYGPHGAGVAE		281	298	0.0369	-0.001	-0.0128	0.0468	-0.146		0.0369	-0.001	-0.0128	0.0468	-0.146
VGLYGPHGAGVAE		286	298	-0.0022	-0.0041	-0.0591	0.0766	-0.0807		-0.0022	-0.0041	-0.0591	0.0766	-0.0807
YGPHGAG		289	295	0.0203	-0.0137	0.0127	0.0845	-0.0316		0.0203	-0.0137	0.0127	0.0845	-0.0316
LYGPHGAGVAE		288	298	-0.0062	-0.0384	0.0107	0.0051	-0.1126		-0.0062	-0.0384	0.0107	0.0051	-0.1126
YGPHGAGVAEHCDF	*	289	302	0.0073	-0.048	-0.027	-0.023	-0.0535		0.0073	-0.048	-0.027	-0.023	-0.0535
VAEHCDF		296	302	-0.0068	-0.0968	-0.0956	-0.0491	-0.0256		-0.0068	-0.0968	-0.0956	-0.0491	-0.0256
ESHRASGIAT		303	312	-0.0469	0.0051	-0.0536	-0.0227	-0.0787		-0.0469	0.0051	-0.0536	-0.0227	-0.0787
ESHRASGIATPKTNDKGGAKTVMD	*	303	326	-0.0405	0.1899	0.0979	0.0419	0.0017		-0.0405	0.1899	0.0979	0.0419	0.0017
IATPKTNDKGGAKTVM		310	325	-0.09	0.134	0.0899	0.02	0.1481		-0.09	0.134	0.0899	0.02	0.1481
IATPKTNDKGGAKTVMD		310	326	-0.0562	0.2159	-0.0105	-0.0332	0.1573		-0.0562	0.2159	-0.0105	-0.0332	0.1573
ATPKTNDKGGAKTVM		311	325	-0.1314	0.2149	0.0552	0.0575	0.1594		-0.1314	0.2149	0.0552	0.0575	0.1594
DRVDMIT		326	332	0.0089	-0.0364	-0.0315	0.0022	-0.1165		0.0089	-0.0364	-0.0315	0.0022	-0.1165
DRVDMITGTLG	*	326	336	0.0198	-0.0794	0.0025	-0.0658	-0.0269		0.0198	-0.0794	0.0025	-0.0658	-0.0269
DRVDMITGTLGKSFGSVGG		326	344	-0.031	-0.1333	-0.0629	-0.132	-0.2063		-0.031	-0.1333	-0.0629	-0.132	-0.2063
ITGTLGKSF		331	339	-0.0449	0.0081	-0.0363	0.0493	-0.0397		-0.0449	0.0081	-0.0363	0.0493	-0.0397
DRVDMITGTLGKSFGSVGGY		326	345	-0.0066	0.005	-0.0194	0.0077	-0.163		-0.0066	0.005	-0.0194	0.0077	-0.163
RVDMITGTLGKSFGSVGG		327	344	-0.0011	0.0063	-0.0124	0.0584	-0.1137		-0.0011	0.0063	-0.0124	0.0584	-0.1137
RVDMITGTLGKSFGSVGGY		327	345	0.0228	-0.0486	-0.0112	0.0221	-0.1241		0.0228	-0.0486	-0.0112	0.0221	-0.1241
DRVDMITGTLGKSFGSVGGYVAA		326	348	-0.0053	-0.0186	-0.0208	0.0865	-0.1436		-0.0053	-0.0186	-0.0208	0.0865	-0.1436
MITGTLGKSFGSVGGY		330	345	0.0343	0.0319	-0.0478	0.0443	-0.0532		0.0343	0.0319	-0.0478	0.0443	-0.0532
ITGTLGKSFGSVGGY		331	345	0.0688	-0.0204	0.0238	0.067	0.0227		0.0688	-0.0204	0.0238	0.067	0.0227
GTLGKSFGSVGG		333	344	0.0492	-0.0355	-0.0098	-0.0918	-0.1759		0.0492	-0.0355	-0.0098	-0.0918	-0.1759
MITGTLGKSFGSVGGYVAA		330	348	-0.0199	-0.0597	-0.0219	0.0084	-0.1225		-0.0199	-0.0597	-0.0219	0.0084	-0.1225
ITGTLGKSFGSVGGYVAA		331	348	0.017	0.036	0.0231	-0.0033	-0.1002		0.017	0.036	0.0231	-0.0033	-0.1002
DRVDMITGTLGKSFGSVGGYVAASRKLIDW		326	355	-0.0531	0.0741	-0.0302	-0.1748	-0.039		-0.0531	0.0741	-0.0302	-0.1748	-0.039
GKSFGSVGGYVAA	*	336	348	0.0202	-0.1093	-0.0204	-0.046	-0.1633		0.0202	-0.1093	-0.0204	-0.046	-0.1633
FGSVGGY		339	345	-0.0369	-0.0532	-0.0016	-0.0312	-0.0768		-0.0369	-0.0532	-0.0016	-0.0312	-0.0768
ITGTLGKSFGSVGGYVAASRKLIDW		331	355	-0.0018	0.0145	-0.0683	-0.057	-0.1387		-0.0018	0.0145	-0.0683	-0.057	-0.1387
GTLGKSFGSVGGYVAASRKLIDW		333	355	0.0641	0.0486	-0.0122	-0.0176	-0.1199		0.0641	0.0486	-0.0122	-0.0176	-0.1199
GKSFGSVGGYVAASRKLIDW		336	355	0.0602	0.0594	0.0116	0.1167	0.0191		0.0602	0.0594	0.0116	0.1167	0.0191
YVAASRKLIDW		345	355	0.0273	0.057	0.0081	-0.0292	0.0191		0.0273	0.057	0.0081	-0.0292	0.0191
VAASRKLIDWF		346	356	0.0976	0.0624	-0.0046	-0.0222	-0.0031		0.0976	0.0624	-0.0046	-0.0222	-0.0031
AASRKLIDW		347	355	0.0391	0.0448	0.0295	0.0157	0.0041		0.0391	0.0448	0.0295	0.0157	0.0041
ASRKLIDW		348	355	-0.0086	0.0296	-0.0114	-0.0234	-0.0259		-0.0086	0.0296	-0.0114	-0.0234	-0.0259
SRKLIDWF	*	349	356	0.0067	0.0211	-0.0231	0.0314	0.0786		0.0067	0.0211	-0.0231	0.0314	0.0786
FRSFAPGF	*	356	363	0.0186	0.0535	0.0247	0.0078	-0.0274		0.0186	0.0535	0.0247	0.0078	-0.0274
RSFAPGF		357	363	0.0123	0.1173	0.0231	-0.0201	-0.0961		0.0123	0.1173	0.0231	-0.0201	-0.0961
IFTTTLPPSVM	*	364	374	-0.0181	0.0297	-0.0368	-0.0067	-0.0707		-0.0181	0.0297	-0.0368	-0.0067	-0.0707
FTTTLPPSVM		365	374	-0.0235	0.0237	-0.0746	0.0862	-0.0631		-0.0235	0.0237	-0.0746	0.0862	-0.0631
TTTLPPSVM		366	374	0.0653	0.0456	0.0101	0.0068	0.0175		0.0653	0.0456	0.0101	0.0068	0.0175
TTLPPSVM		367	374	-0.0112	-0.0763	-0.0011	-0.0329	-0.1094		-0.0112	-0.0763	-0.0011	-0.0329	-0.1094
MAGATAA	*	374	380	-0.0607	-0.0467	-0.0679	-0.0331	-0.0476		-0.0607	-0.0467	-0.0679	-0.0331	-0.0476
AGATAAIRYQRCHIDL		375	390	0.0008	0.0266	0.0012	0.0665	-0.0249		0.0008	0.0266	0.0012	0.0665	-0.0249
AAIRYQRC		379	386	-0.0375	-0.0241	-0.0328	0.0042	-0.0156		-0.0375	-0.0241	-0.0328	0.0042	-0.0156
IRYQRCHIDL	*	381	390	0.009	-0.0593	0.0062	-0.0191	-0.0522		0.009	-0.0593	0.0062	-0.0191	-0.0522
HIDLRTSQQKHTM		387	399	0.0223	-0.0057	-0.0148	0.0842	-0.0011		0.0223	-0.0057	-0.0148	0.0842	-0.0011
HIDLRTSQQKHTMY		387	400	0.0109	-0.0207	-0.02	-0.0057	0.0018		0.0109	-0.0207	-0.02	-0.0057	0.0018
YVKKAFHELGIPVIPNPSHIVPVL	*	400	423	-0.0778	0.0381	0.0062	-0.0268	0.1379		-0.0778	0.0381	0.0062	-0.0268	0.1379
HELGIPVIPNPSHIVPVL		406	423	-0.0274	0.031	-0.0728	-0.0796	-0.072		-0.0274	0.031	-0.0728	-0.0796	-0.072
LGIPVIPNPSHIVPVL		408	423	0.0278	0.0785	-0.013	-0.0446	-0.057		0.0278	0.0785	-0.013	-0.0446	-0.057
IPVIPNPSHIVPVL		410	423	-0.0036	0.0096	-0.0014	-0.0309	-0.0791		-0.0036	0.0096	-0.0014	-0.0309	-0.0791
PNPSHIVPVL		414	423	-0.0289	-0.0421	-0.0779	-0.0826	-0.0332		-0.0289	-0.0421	-0.0779	-0.0826	-0.0332
LAKQASDIL	*	429	437	-0.0218	-0.0594	-0.0589	-0.1149	-0.1376		-0.0218	-0.0594	-0.0589	-0.1149	-0.1376
AKQASDIL		430	437	0.012	0.0246	-0.0172	0.0129	-0.077		0.012	0.0246	-0.0172	0.0129	-0.077
ILINKHQIYVQ		436	446	-0.0389	-0.0655	-0.0667	-0.0728	-0.123		-0.0389	-0.0655	-0.0667	-0.0728	-0.123
INKHQIY		438	444	0.0165	0.0266	-0.0109	0.0187	-0.0512		0.0165	0.0266	-0.0109	0.0187	-0.0512
ILINKHQIYVQA		436	447	-0.0068	0.0134	-0.0234	-0.0625	-0.0549		-0.0068	0.0134	-0.0234	-0.0625	-0.0549
INKHQIYVQ	*	438	446	-0.056	0.1509	-0.0321	-0.0091	-0.0967		-0.056	0.1509	-0.0321	-0.0091	-0.0967
INFPTVA		448	454	-0.1266	0.0269	0.0182	-0.0346	0.0068		-0.1266	0.0269	0.0182	-0.0346	0.0068
AINFPTVARGTERL	*	447	460	-0.2205	-0.0147	-0.0988	-0.1176	-0.0999		-0.2205	-0.0147	-0.0988	-0.1176	-0.0999
PTVARGTERL		451	460	-0.1403	-0.0045	-0.099	-0.15	-0.1811		-0.1403	-0.0045	-0.099	-0.15	-0.1811
TVARGTERL		452	460	-0.1163	-0.2491	-0.0964	-0.1326	-0.1421		-0.1163	-0.2491	-0.0964	-0.1326	-0.1421
RITPTPGHTND		461	471	0.0303	0.0423	0.0246	-0.0372	0.0203		0.0303	0.0423	0.0246	-0.0372	0.0203
RITPTPGHTNDL		461	472	0.014	-0.005	0.0104	-0.0182	-0.0131		0.014	-0.005	0.0104	-0.0182	-0.0131
RITPTPGHTNDLSD	*	461	474	-0.0118	0.0272	0.0039	0.0074	0.0281		-0.0118	0.0272	0.0039	0.0074	0.0281
RITPTPGHTNDLSDIL		461	476	-0.0763	-0.011	-0.0591	-0.0905	-0.114		-0.0763	-0.011	-0.0591	-0.0905	-0.114
PGHTNDL		466	472	0.0457	0.0235	0.0088	0.0282	-0.0199		0.0457	0.0235	0.0088	0.0282	-0.0199
ILINAVD		475	481	-0.0109	-0.0504	-0.0382	-0.0131	-0.0943		-0.0109	-0.0504	-0.0382	-0.0131	-0.0943
ILINAVDDVF	*	475	484	0.0282	-0.0117	-0.0474	-0.0376	0.0116		0.0282	-0.0117	-0.0474	-0.0376	0.0116
VDDVFNE		480	486	0.0176	0.0328	0.004	0.0402	0.053		0.0176	0.0328	0.004	0.0402	0.053
LQLPRVRD		487	494	-0.1721	-0.1087	-0.1705	-0.2778	-0.2425		-0.1721	-0.1087	-0.1705	-0.2778	-0.2425
NELQLPRVRDWESQGGL	*	485	501	-0.2768	0.0027	-0.1232	-0.2722	-0.1964		-0.2768	0.0027	-0.1232	-0.2722	-0.1964
LQLPRVRDWESQGGL		487	501	-0.1968	0.0732	-0.0682	-0.1829	-0.077		-0.1968	0.0732	-0.0682	-0.1829	-0.077
PRVRDWESQGGLL		490	502	-0.2284	0.1697	0.0219	-0.0246	-0.0293		-0.2284	0.1697	0.0219	-0.0246	-0.0293
NELQLPRVRDWESQGGLLGVGESGF		485	509	-0.3765	0.1998	-0.0846	-0.1264	0.1022		-0.3765	0.1998	-0.0846	-0.1264	0.1022
LQLPRVRDWESQGGLLGVGESGF		487	509	-0.1949	0.1787	-0.0615	0.0554	0.1681		-0.1949	0.1787	-0.0615	0.0554	0.1681
WESQGGL		495	501	-0.0504	0.1144	0.0486	0.0398	0.0246		-0.0504	0.1144	0.0486	0.0398	0.0246
PRVRDWESQGGLLGVGESG		490	508	-0.1516	0.2304	0.0811	0.1077	0.2019		-0.1516	0.2304	0.0811	0.1077	0.2019
WESQGGLLG		495	503	-0.033	0.0939	0.1106	-0.004	0.0016		-0.033	0.0939	0.1106	-0.004	0.0016
PRVRDWESQGGLLGVGESGF		490	509	-0.5261	0.0697	0.0547	0.011	0.0307		-0.5261	0.0697	0.0547	0.011	0.0307
WESQGGLLGVG		495	505	-0.1411	0.1433	0.0733	0.0938	0.1464		-0.1411	0.1433	0.0733	0.0938	0.1464
WESQGGLLGVGESG		495	508	-0.281	0.1549	0.0331	-0.0072	0.0245		-0.281	0.1549	0.0331	-0.0072	0.0245
LGVGESG		502	508	-0.0195	0.0269	-0.0278	-0.0144	-0.0084		-0.0195	0.0269	-0.0278	-0.0144	-0.0084
LGVGESGF	*	502	509	-0.099	0.0715	0.0141	-0.018	0.0091		-0.099	0.0715	0.0141	-0.018	0.0091
GVGESGF		503	509	-0.0643	0.0536	0.0152	-0.046	-0.0086		-0.0643	0.0536	0.0152	-0.046	-0.0086
LSLTNDDLNPNVRD		521	534	-0.0196	0.0425	0.013	0.0205	-0.0299		-0.0196	0.0425	0.013	0.0205	-0.0299
SLTNDDLNPNVRD		522	534	-0.0246	0.1059	0.0519	-0.0198	-0.0346		-0.0246	0.1059	0.0519	-0.0198	-0.0346
TNDDLNPNVRD		524	534	-0.0415	0.0184	-0.0432	0.0217	-0.0434		-0.0415	0.0184	-0.0432	0.0217	-0.0434
LSLTNDDLNPNVRDPIVKQ		521	539	-0.0033	0.2449	0.051	0.0427	0.0505		-0.0033	0.2449	0.051	0.0427	0.0505
LSLTNDDLNPNVRDPIVKQL	*	521	540	-0.0033	0.139	0.0608	0.0472	0.1403		-0.0033	0.139	0.0608	0.0472	0.1403
SLTNDDLNPNVRDPIVKQ		522	539	-0.1202	0.1352	0.0379	-0.0549	-0.072		-0.1202	0.1352	0.0379	-0.0549	-0.072
DLNPNVRD		527	534	-0.1272	0.0971	-0.0136	-0.1025	0.0425		-0.1272	0.0971	-0.0136	-0.1025	0.0425
SLTNDDLNPNVRDPIVKQL		522	540	-0.0691	0.2286	0.0727	-0.011	0.0904		-0.0691	0.2286	0.0727	-0.011	0.0904
SLTNDDLNPNVRDPIVKQLE		522	541	-0.1308	0.2212	0.0265	0.0059	0.0549		-0.1308	0.2212	0.0265	0.0059	0.0549
TNDDLNPNVRDPIVKQ		524	539	-0.0422	0.2653	-0.0132	-0.004	0.1053		-0.0422	0.2653	-0.0132	-0.004	0.1053
DLNPNVRDPIVKQ		527	539	-0.0225	0.1492	0.0387	0.0081	0.0019		-0.0225	0.1492	0.0387	0.0081	0.0019
DLNPNVRDPIVKQLE		527	541	0.0562		-0.0226	-0.0088			0.0562	100	-0.0226	-0.0088	100
NPNVRDPIVKQ		529	539	0.0342	0.198	0.102	0.0541	0.1177		0.0342	0.198	0.102	0.0541	0.1177
PNVRDPIVKQ		530	539	-0.0127	0.0904	0.0529	-0.015	-0.0281		-0.0127	0.0904	0.0529	-0.015	-0.0281
PIVKQLE		535	541	0.1155	0.2188	0.136	0.1277	0.1276		0.1155	0.2188	0.136	0.1277	0.1276
EVSSGIKQ	*	541	548	-0.1128	0.1027	0.1217	0.1968	0.1964		-0.1128	0.1027	0.1217	0.1968	0.1964

## Sheet: mtClpX+ATP, ALAS-holo
(holo d34-ALAS + mtClpX + ATP) - (holo d34-ALAS + ATP)									uptake difference scale (Da)	0.49	0.51	1.01	1.51	2.1
Deuterium uptake difference of peptides (daltons): numbers displayed at left, corresponding heat map to the right										0	>0.5	>1.0	>1.5	>2.0
				time (min)						time (min)
sequence	linear	start	end	0.5	5	10	30	60		0.5	5	10	30	60
ATATGAGAA		35	43	-0.1757	-0.2749	0.0065	0.2043	0.3311		-0.1757	-0.2749	0.0065	0.2043	0.3311
ATATGAGAAAAT	*	35	46	-0.2988	-0.2116	-0.0742	0.436	0.2655		-0.2988	-0.2116	-0.0742	0.436	0.2655
ATGAGAAAATA		37	47	-0.2233	-0.3305	-0.0129	0.2062	0.4278		-0.2233	-0.3305	-0.0129	0.2062	0.4278
ATATGAGAAAATATASST		35	52	0.0737	-0.0832	0.2924	0.5187	0.5662		0.0737	-0.0832	0.2924	0.5187	0.5662
ATATGAGAAAATATASSTHAAA		35	56	-0.1204	0.1012	0.341	0.5276	0.4504		-0.1204	0.1012	0.341	0.5276	0.4504
ATATGAGAAAATATASSTHAAAA		35	57	-0.2222	0.0389	0.31	0.3562	0.3514		-0.2222	0.0389	0.31	0.3562	0.3514
ATATGAGAAAATATASSTHAAAAA		35	58	-0.0133	0.1927	0.5372	0.495	0.3958		-0.0133	0.1927	0.5372	0.495	0.3958
ATATGAGAAAATATASSTHAAAAAAA		35	60	0.0265	-0.0295	0.4796	0.5195	0.6844		0.0265	-0.0295	0.4796	0.5195	0.6844
ATATGAGAAAATATASSTHAAAAAAAAAN		35	63	0.2663	-0.0939	0.5673	0.6553	0.5957		0.2663	-0.0939	0.5673	0.6553	0.5957
AATATASSTHAAA		44	56	-0.017	-0.1207	-0.1061	0.0492	-0.0428		-0.017	-0.1207	-0.1061	0.0492	-0.0428
AATATASSTHAAAAAAAAANHSTQESGF		44	71	-0.1019	0.1342	0.2988	0.2402	-0.5366		-0.1019	0.1342	0.2988	0.2402	-0.5366
TATASSTHAAAAAAAAANHSTQESGF		46	71	-0.0327	0.2226	0.4852	0.304	-0.1948		-0.0327	0.2226	0.4852	0.304	-0.1948
ATASSTHAAAAAAAAANHSTQESGF	*	47	71	-0.2334	-0.0698	0.0713	0.1347	-0.4685		-0.2334	-0.0698	0.0713	0.1347	-0.4685
TASSTHAAAAAAAAANHSTQESGF		48	71	-0.2911	0.3521	0.3573	0.1602	-0.183		-0.2911	0.3521	0.3573	0.1602	-0.183
ASSTHAAAAAAAAANHSTQESGF		49	71	-0.1824	0.0514	0.247	0.2237	-0.0542		-0.1824	0.0514	0.247	0.2237	-0.0542
HAAAAAAAAANHSTQESGF		53	71	0.1223	0.3211	0.4125	0.4585	0.0373		0.1223	0.3211	0.4125	0.4585	0.0373
HAAAAAAAAANHSTQESGFD		53	72	-0.0862	0.0903	0.2277	0.3311	-0.2211		-0.0862	0.0903	0.2277	0.3311	-0.2211
AAAAAANHSTQESGF		57	71	-0.1332	-0.1216	-0.0125	0.1475	-0.0923		-0.1332	-0.1216	-0.0125	0.1475	-0.0923
AAAAAANHSTQESGFD		57	72	-0.1389	-0.0874	-0.0932	0.0981	-0.0707		-0.1389	-0.0874	-0.0932	0.0981	-0.0707
AAAAANHSTQESGF		58	71	-0.2015	-0.2309	-0.148	-0.1612	-0.3502		-0.2015	-0.2309	-0.148	-0.1612	-0.3502
AAAANHSTQESGF		59	71	-0.0512	-0.1219	0.0401	-0.0812	-0.2026		-0.0512	-0.1219	0.0401	-0.0812	-0.2026
AAANHSTQESGF		60	71	-0.089	-0.0568	-0.0515	-0.1224	-0.2011		-0.089	-0.0568	-0.0515	-0.1224	-0.2011
AAANHSTQESGFD		60	72	-0.1647	-0.1165	-0.0786	-0.1529	-0.2375		-0.1647	-0.1165	-0.0786	-0.1529	-0.2375
AANHSTQESGF		61	71	-0.2439	-0.1775	-0.1526	-0.1719	-0.2661		-0.2439	-0.1775	-0.1526	-0.1719	-0.2661
AANHSTQESGFD		61	72	-0.1229	-0.1837	-0.0382	-0.1929	-0.0719		-0.1229	-0.1837	-0.0382	-0.1929	-0.0719
HSTQESGF		64	71	-0.0882	-0.152	-0.169	-0.0909	-0.0376		-0.0882	-0.152	-0.169	-0.0909	-0.0376
HSTQESGFD		64	72	-0.2055	-0.0551	0.0145	-0.1011	-0.1048		-0.2055	-0.0551	0.0145	-0.1011	-0.1048
DYEGLID		72	78	-0.024	0.2222	0.4287	0.9769	0.8764		-0.024	0.2222	0.4287	0.9769	0.8764
DYEGLIDSE		72	80	-0.0832	0.2057	0.2495	1.0047	0.6175		-0.0832	0.2057	0.2495	1.0047	0.6175
DYEGLIDSEL	*	72	81	-0.0071	0.4081	0.6717	1.4355	1.2094		-0.0071	0.4081	0.6717	1.4355	1.2094
YEGLIDSEL		73	81	-0.0709	0.2627	0.6038	1.3218	1.1753		-0.0709	0.2627	0.6038	1.3218	1.1753
EGLIDSEL		74	81	-0.0912	0.2203	0.4996	1.2498	1.1511		-0.0912	0.2203	0.4996	1.2498	1.1511
IDSELQKKRLDKS		77	89	-0.0251	0.4582	0.6823	1.2081	0.571		-0.0251	0.4582	0.6823	1.2081	0.571
SELQKKRLDKS		79	89	-0.1784	0.1604	0.5008	0.8126	0.7235		-0.1784	0.1604	0.5008	0.8126	0.7235
ELQKKRLDKS		80	89	-0.045	0.2855	0.3212	0.5686	0.2701		-0.045	0.2855	0.3212	0.5686	0.2701
DYEGLIDSELQKKRLDKSYRYFNNINRL		72	99	0.0438	1.6598	2.1364	4.4859	3.5619		0.0438	1.6598	2.1364	4.4859	3.5619
QKKRLDKS	*	82	89	-0.1922	0.0218	0.0836	0.092	0.0806		-0.1922	0.0218	0.0836	0.092	0.0806
KKRLDKS		83	89	-0.0345	0.1186	0.1132	-0.0008	-0.0261		-0.0345	0.1186	0.1132	-0.0008	-0.0261
QKKRLDKSYRY		82	92	-0.1842	0.0023	-0.01	-0.1062	-0.2399		-0.1842	0.0023	-0.01	-0.1062	-0.2399
QKKRLDKSYRYFNNINRL		82	99	-0.0191	0.4409	0.6813	1.6627	0.8495		-0.0191	0.4409	0.6813	1.6627	0.8495
YRYFNNI		90	96	-0.1207	0.0249	0.16	0.4846	0.3375		-0.1207	0.0249	0.16	0.4846	0.3375
FNNINRL	*	93	99	-0.1584	0.3398	0.5861	1.6398	1.352		-0.1584	0.3398	0.5861	1.6398	1.352
YRYFNNINRLAKEFPLAHRQREAD		90	113	-0.2757	0.9796	1.1003	3.4634	2.3338		-0.2757	0.9796	1.1003	3.4634	2.3338
KEFPLAHRQREAD	*	101	113	-0.2173	-0.0416	0.1081	0.6422	0.0752		-0.2173	-0.0416	0.1081	0.6422	0.0752
FPLAHRQREAD		103	113	-0.2912	0.0939	0.3343	0.7754	0.3653		-0.2912	0.0939	0.3343	0.7754	0.3653
AKEFPLAHRQREADKVTV		100	117	-0.0994	0.5154	0.79	2.5447	1.9709		-0.0994	0.5154	0.79	2.5447	1.9709
FPLAHRQREADKVTVW		103	118	-0.1807	0.7046	1.0438	2.7104	2.4088		-0.1807	0.7046	1.0438	2.7104	2.4088
PLAHRQREADKVTVW		104	118	0.0822	0.1709	0.7879	2.5051	2.0565		0.0822	0.1709	0.7879	2.5051	2.0565
KVTVWCSND	*	114	122	-0.1736	0.2057	0.3753	1.3965	1.5136		-0.1736	0.2057	0.3753	1.3965	1.5136
KVTVWCSNDY		114	123	-0.0518	0.246	0.4375	1.6319	1.6209		-0.0518	0.246	0.4375	1.6319	1.6209
YLALSKHPEVL	*	123	133	-0.0177	0.0569	0.3851	1.8772	2.0548		-0.0177	0.0569	0.3851	1.8772	2.0548
LALSKHPEVL		124	133	0.0229	-0.0729	0.6652	1.9233	1.9868		0.0229	-0.0729	0.6652	1.9233	1.9868
DAMHKTID		134	141	0.0371	0.2124	0.305	1.2321	1.3823		0.0371	0.2124	0.305	1.2321	1.3823
DAMHKTIDKYGCG	*	134	146	-0.0924	0.0408	0.4439	2.9543	3.2993		-0.0924	0.0408	0.4439	2.9543	3.2993
HKTIDKYGCG		137	146	-0.0531	0.1705	0.4105	2.1475	2.7669		-0.0531	0.1705	0.4105	2.1475	2.7669
DAMHKTIDKYGCGAGGTRN		134	152	-0.0794	-0.122	0.7562	4.5286	4.761		-0.0794	-0.122	0.7562	4.5286	4.761
HKTIDKYGCGAGGTRN		137	152	0.0202	0.1236	0.5359	3.9007	3.8056		0.0202	0.1236	0.5359	3.9007	3.8056
AGGTRNIAGHNIPTLNL		147	163	0.0624	0.4765	0.9412	3.2919	3.2696		0.0624	0.4765	0.9412	3.2919	3.2696
LATLHKKEGAL		167	177	-0.0496	-0.0722	-0.1135	-0.07	0.0043		-0.0496	-0.0722	-0.1135	-0.07	0.0043
TLHKKEGAL		169	177	-0.1106	-0.068	-0.053	-0.0262	-0.0092		-0.1106	-0.068	-0.053	-0.0262	-0.0092
ATLHKKEGALVF	*	168	179	0.0178	0.0015	-0.0091	0.0855	0.0934		0.0178	0.0015	-0.0091	0.0855	0.0934
LHKKEGAL		170	177	0.0669	-0.0088	0.0663	0.0574	0.0844		0.0669	-0.0088	0.0663	0.0574	0.0844
HKKEGAL		171	177	-0.0268	-0.0899	-0.0088	0.0387	0.0861		-0.0268	-0.0899	-0.0088	0.0387	0.0861
HKKEGALVF		171	179	-0.0047	-0.2339	-0.0808	-0.0523	-0.1106		-0.0047	-0.2339	-0.0808	-0.0523	-0.1106
VANDAVL	*	184	190	-0.0511	0.0507	0.1197	0.7619	1.0231		-0.0511	0.0507	0.1197	0.7619	1.0231
SLLGQKMKD	*	191	199	-0.1549	-0.0839	0.032	0.5691	0.5921		-0.1549	-0.0839	0.032	0.5691	0.5921
LLGQKMKD		192	199	-0.0637	0.0009	0.1068	0.5333	0.4971		-0.0637	0.0009	0.1068	0.5333	0.4971
LGQKMKD		193	199	-0.1103	0.0327	0.0892	0.4687	0.5841		-0.1103	0.0327	0.0892	0.4687	0.5841
LVIFSDELNHASM	*	200	212	0.0092	0.1764	0.2934	1.1514	1.2166		0.0092	0.1764	0.2934	1.1514	1.2166
VIFSDELNHASM		201	212	0.0691	0.1982	0.3486	1.3303	1.5128		0.0691	0.1982	0.3486	1.3303	1.5128
FSDELNHASM		203	212	-0.1408	0.0155	0.174	1.111	1.2187		-0.1408	0.0155	0.174	1.111	1.2187
SDELNHASM		204	212	-0.0351	0.0612	0.2678	1.2099	1.3188		-0.0351	0.0612	0.2678	1.2099	1.3188
IVGIKHANVKKHIFKHNDLNEL		213	234	-0.0211		0.0182	-0.0111	0.0398		-0.0211	100	0.0182	-0.0111	0.0398
LEQLLQSYPKSVPKL		234	248	-0.0847	-0.0164	0.0257	-0.0063	-0.0287		-0.0847	-0.0164	0.0257	-0.0063	-0.0287
EQLLQSYPKSVPKL		235	248	0.0693	0.032	0.1051	0.1087	0.0704		0.0693	0.032	0.1051	0.1087	0.0704
LEQLLQSYPKSVPKLIA	*	234	250	-0.0073	0.114	0.0767	0.1072	0.0596		-0.0073	0.114	0.0767	0.1072	0.0596
EQLLQSYPKSVPKLIA		235	250	0.1283	0.1465	0.1651	0.1735	0.1178		0.1283	0.1465	0.1651	0.1735	0.1178
LLQSYPKSVPKL		237	248	-0.0526	0.0003	-0.0128	-0.1086	-0.2298		-0.0526	0.0003	-0.0128	-0.1086	-0.2298
LLQSYPKSVPKLIA		237	250	-0.146	0.0055	0.0043	-0.019	-0.1265		-0.146	0.0055	0.0043	-0.019	-0.1265
QSYPKSVPKLIA		239	250	-0.0616	-0.1299	-0.0611	-0.0528	-0.0935		-0.0616	-0.1299	-0.0611	-0.0528	-0.0935
YPKSVPKL		241	248	0.005	0.0102	0.0043	0.0391	0.0785		0.005	0.0102	0.0043	0.0391	0.0785
YSMAGSV	*	255	261	-0.0068	0.0324	0.0374	0.0114	-0.123		-0.0068	0.0324	0.0374	0.0114	-0.123
YSMAGSVA		255	262	-0.1238	-0.0658	0.0368	0.0683	0.0185		-0.1238	-0.0658	0.0368	0.0683	0.0185
YSMAGSVAD		255	263	-0.0877	-0.042	0.0724	0.15	0.0517		-0.0877	-0.042	0.0724	0.15	0.0517
YSMAGSVADI		255	264	-0.1438	-0.0775	-0.0007	-0.0214	-0.0142		-0.1438	-0.0775	-0.0007	-0.0214	-0.0142
GSVADIE		259	265	-0.1299	0.026	0.0082	-0.1022	-0.0525		-0.1299	0.026	0.0082	-0.1022	-0.0525
ADIEKICDL	*	262	270	0.0698	0.1146	0.0884	0.0795	0.1156		0.0698	0.1146	0.0884	0.0795	0.1156
DIEKICD		263	269	-0.0785	-0.037	-0.0828	0.0408	0.0029		-0.0785	-0.037	-0.0828	0.0408	0.0029
LADKYGAL		270	277	-0.1051	-0.1205	-0.1002	-0.0777	-0.1694		-0.1051	-0.1205	-0.1002	-0.0777	-0.1694
LADKYGALT		270	278	-0.1228	-0.0379	-0.002	-0.0983	-0.172		-0.1228	-0.0379	-0.002	-0.0983	-0.172
ADKYGAL		271	277	-0.0933	-0.0383	0.0051	-0.0339	-0.077		-0.0933	-0.0383	0.0051	-0.0339	-0.077
ADKYGALTF	*	271	279	-0.1144	-0.1036	-0.0999	-0.0986	-0.1263		-0.1144	-0.1036	-0.0999	-0.0986	-0.1263
TFLDEVHAVGL		278	288	-0.0667	0.02	0.0027	0.1414	0.0942		-0.0667	0.02	0.0027	0.1414	0.0942
LDEVHAVGL	*	280	288	-0.0506	-0.0335	-0.0505	0.0355	0.0395		-0.0506	-0.0335	-0.0505	0.0355	0.0395
DEVHAVGLYGPHGAG		281	295	0.0911	0.0597	0.0348	0.2114	0.1577		0.0911	0.0597	0.0348	0.2114	0.1577
LDEVHAVGLYGPHGAGVAE		280	298	0.0709	0.014	0.0139	0.0563	0.0151		0.0709	0.014	0.0139	0.0563	0.0151
DEVHAVGLYGPHGAGVAE		281	298	0.1207	0.0802	0.0835	0.1263	0.1012		0.1207	0.0802	0.0835	0.1263	0.1012
VGLYGPHGAGVAE		286	298	-0.093	-0.1627	-0.1099	-0.0679	-0.1357		-0.093	-0.1627	-0.1099	-0.0679	-0.1357
YGPHGAG		289	295	-0.0552	-0.0782	-0.065	-0.0285	-0.0599		-0.0552	-0.0782	-0.065	-0.0285	-0.0599
LYGPHGAGVAE		288	298	0.0042	-0.0546	-0.0594	-0.0413	-0.0382		0.0042	-0.0546	-0.0594	-0.0413	-0.0382
YGPHGAGVAE		289	298	-0.026	-0.0641	-0.0823	-0.0864	-0.0979		-0.026	-0.0641	-0.0823	-0.0864	-0.0979
YGPHGAGVAEHCDF	*	289	302	0.1275	0.014	0.0504	0.1447	0.1071		0.1275	0.014	0.0504	0.1447	0.1071
VAEHCDF		296	302	-0.1243	-0.1232	-0.0689	-0.0927	-0.131		-0.1243	-0.1232	-0.0689	-0.0927	-0.131
ESHRASGIAT		303	312	-0.0545	-0.121	-0.0327	0.0047	0.0329		-0.0545	-0.121	-0.0327	0.0047	0.0329
ESHRASGIATPKTNDKGGAKTVMD	*	303	326	-0.2045	-0.0596	0.0063	-0.0538	-0.3781		-0.2045	-0.0596	0.0063	-0.0538	-0.3781
IATPKTNDKGGAKTVM		310	325	-0.2585	-0.266	-0.1373	-0.0831	-0.2358		-0.2585	-0.266	-0.1373	-0.0831	-0.2358
IATPKTNDKGGAKTVMD		310	326	-0.3171	-0.4877	-0.2093	-0.2838	-0.442		-0.3171	-0.4877	-0.2093	-0.2838	-0.442
ATPKTNDKGGAKTVM		311	325	-0.202	-0.2142	-0.1241	-0.1578	-0.4105		-0.202	-0.2142	-0.1241	-0.1578	-0.4105
DRVDMIT		326	332	-0.1036	-0.0893	-0.0713	-0.076	-0.0618		-0.1036	-0.0893	-0.0713	-0.076	-0.0618
DRVDMITGTLG	*	326	336	0.0674	0.0771	0.1661	0.4908	0.8376		0.0674	0.0771	0.1661	0.4908	0.8376
DRVDMITGTLGKSFGSVGG		326	344	0.0625	0.3923	0.8706	3.4074	3.691		0.0625	0.3923	0.8706	3.4074	3.691
ITGTLGKSF		331	339	-0.0679	0.1284	0.3389	1.7403	2.0035		-0.0679	0.1284	0.3389	1.7403	2.0035
DRVDMITGTLGKSFGSVGGY		326	345	0.1218	0.3288	0.8246	3.5196	3.8483		0.1218	0.3288	0.8246	3.5196	3.8483
RVDMITGTLGKSFGSVGGY		327	345	0.0217	0.3453	0.6475	3.6459	4.0509		0.0217	0.3453	0.6475	3.6459	4.0509
DRVDMITGTLGKSFGSVGGYVAA		326	348	0.2476	0.5707	1.2699	3.3611	3.487		0.2476	0.5707	1.2699	3.3611	3.487
MITGTLGKSFGSVGGY		330	345	-0.1892	0.1539	0.3784	2.8548	3.2386		-0.1892	0.1539	0.3784	2.8548	3.2386
ITGTLGKSFGSVGG		331	344	-0.1143	0.3534	0.9451	2.841	2.8955		-0.1143	0.3534	0.9451	2.841	2.8955
GTLGKSFGSVGG		333	344	-0.1715	0.1569	0.4224	2.3154	2.7384		-0.1715	0.1569	0.4224	2.3154	2.7384
ITGTLGKSFGSVGGYVAA		331	348	0.0166	0.3261	0.6254	2.5706	2.8791		0.0166	0.3261	0.6254	2.5706	2.8791
GKSFGSVGGYVAA	*	336	348	-0.0583	-0.211	0.1964	1.5171	1.4561		-0.0583	-0.211	0.1964	1.5171	1.4561
FGSVGGY		339	345	-0.0166	-0.048	0.0755	0.7018	0.8553		-0.0166	-0.048	0.0755	0.7018	0.8553
ITGTLGKSFGSVGGYVAASRKLIDW		331	355	0.1299	0.5021	0.9813	2.3708	3.2335		0.1299	0.5021	0.9813	2.3708	3.2335
GTLGKSFGSVGGYVAASRKLIDW		333	355	0.0877	0.3266	0.6323	2.4914	2.575		0.0877	0.3266	0.6323	2.4914	2.575
GKSFGSVGGYVAASRKLIDW		336	355	-0.0925		0.1937	1.1601	1.1618		-0.0925	100	0.1937	1.1601	1.1618
YVAASRKLIDW		345	355	-0.1205	-0.1492	-0.028	0.1527	-0.0441		-0.1205	-0.1492	-0.028	0.1527	-0.0441
VAASRKLIDWF		346	356	-0.0509	0.0287	-0.0066	0.1412	0.0365		-0.0509	0.0287	-0.0066	0.1412	0.0365
AASRKLIDW		347	355	0.014	0.0866	0.1021	0.1426	0.0596		0.014	0.0866	0.1021	0.1426	0.0596
ASRKLIDW		348	355	-0.0576	-0.0524	-0.0256	-0.0518	-0.0535		-0.0576	-0.0524	-0.0256	-0.0518	-0.0535
SRKLIDWF	*	349	356	-0.1001	-0.0538	-0.0306	0.113	0.0442		-0.1001	-0.0538	-0.0306	0.113	0.0442
FRSFAPGF	*	356	363	-0.0061	0.1041	0.329	1.5284	1.5685		-0.0061	0.1041	0.329	1.5284	1.5685
FRSFAPGFI		356	364	-0.1011	0.1681	0.4084	1.3743	1.1733		-0.1011	0.1681	0.4084	1.3743	1.1733
RSFAPGF		357	363	0.05	-0.051	0.2324	1.15	1.1068		0.05	-0.051	0.2324	1.15	1.1068
IFTTTLPPSVM	*	364	374	-0.0342	0.4419	0.7025	2.2826	2.4792		-0.0342	0.4419	0.7025	2.2826	2.4792
FTTTLPPSVM		365	374	-0.0969	0.0528	0.4133	2.4645	2.9968		-0.0969	0.0528	0.4133	2.4645	2.9968
TTTLPPSVM		366	374	-0.0036	0.163	0.419	1.8414	2.1148		-0.0036	0.163	0.419	1.8414	2.1148
TTLPPSVM		367	374	-0.062	0.0425	0.2723	1.4249	1.6647		-0.062	0.0425	0.2723	1.4249	1.6647
MAGATAA	*	374	380	-0.0541	0.0025	-0.0239	0.3661	0.3536		-0.0541	0.0025	-0.0239	0.3661	0.3536
AGATAAIRYQRCHIDL		375	390	0.1586	0.0678	0.1271	0.4397	0.4091		0.1586	0.0678	0.1271	0.4397	0.4091
AAIRYQRC		379	386	0.0521	-0.0303	0.0194	0.0551	0.101		0.0521	-0.0303	0.0194	0.0551	0.101
AIRYQRC		380	386	-0.0572	-0.147	-0.1161	-0.0326	-0.0221		-0.0572	-0.147	-0.1161	-0.0326	-0.0221
AAIRYQRCHIDL		379	390	0.0158	0.0557	0.1131	0.3126	0.3259		0.0158	0.0557	0.1131	0.3126	0.3259
AIRYQRCHIDL		380	390	0.0255	0.0196	0.061	0.3254	0.2782		0.0255	0.0196	0.061	0.3254	0.2782
IRYQRCHIDL	*	381	390	0.0435	0.0439	0.1024	0.3267	0.3277		0.0435	0.0439	0.1024	0.3267	0.3277
HIDLRTSQQKHTM		387	399	-0.0276	-0.0383	0.0224	0.3594	0.3483		-0.0276	-0.0383	0.0224	0.3594	0.3483
HIDLRTSQQKHTMY		387	400	-0.0913	-0.031	0.0482	0.3627	0.2656		-0.0913	-0.031	0.0482	0.3627	0.2656
SQQKHTM		393	399	-0.111	-0.1546	-0.0949	0.0054	-0.1899		-0.111	-0.1546	-0.0949	0.0054	-0.1899
VKKAFHELGIPVIPNPSHIVPVL		401	423	-0.0988	-0.0034	-0.1474	-0.124	-0.192		-0.0988	-0.0034	-0.1474	-0.124	-0.192
HELGIPVIPNPSHIVPVL	*	406	423	-0.0833	-0.1542	-0.0307	-0.0253	-0.1491		-0.0833	-0.1542	-0.0307	-0.0253	-0.1491	406	423
LGIPVIPNPSHIVPVL		408	423	-0.039	-0.0251	0.0053	0.048	0.0174		-0.039	-0.0251	0.0053	0.048	0.0174
IPVIPNPSHIVPVL		410	423	-0.1219	-0.3267	-0.0766	-0.0504	-0.1584		-0.1219	-0.3267	-0.0766	-0.0504	-0.1584
PNPSHIVPVL		414	423	-0.0834	-0.0335	-0.0527	-0.0154	-0.0729		-0.0834	-0.0335	-0.0527	-0.0154	-0.0729
LAKQASDIL	*	429	437	-0.0616	0.0092	-0.0955	-0.0551	-0.1791		-0.0616	0.0092	-0.0955	-0.0551	-0.1791
AKQASDIL		430	437	-0.0674	-0.0552	-0.0494	0.0298	0.03		-0.0674	-0.0552	-0.0494	0.0298	0.03
LINKHQIY		437	444	-0.0992	-0.1013	-0.0277	0.0839	-0.0143		-0.0992	-0.1013	-0.0277	0.0839	-0.0143
ILINKHQIYVQ		436	446	0.1046	0.0317	0.0929	0.2771	0.1417		0.1046	0.0317	0.0929	0.2771	0.1417
INKHQIY		438	444	-0.0835	-0.1085	-0.0464	0.1834	0.1805		-0.0835	-0.1085	-0.0464	0.1834	0.1805
ILINKHQIYVQA		436	447	-0.135	-0.1488	-0.0888	0.1047	-0.0322		-0.135	-0.1488	-0.0888	0.1047	-0.0322
INKHQIYVQ	*	438	446	-0.0638	-0.1175	-0.1127	0.0817	-0.0248		-0.0638	-0.1175	-0.1127	0.0817	-0.0248
INFPTVA		448	454	-0.084	-0.0547	0.1043	0.0158	-0.0089		-0.084	-0.0547	0.1043	0.0158	-0.0089
AINFPTVARGTERL	*	447	460	-0.1364	-0.0599	-0.009	-0.0763	-0.3809		-0.1364	-0.0599	-0.009	-0.0763	-0.3809
PTVARGTERL		451	460	-0.2521	-0.3389	-0.2516	-0.2807	-0.4822		-0.2521	-0.3389	-0.2516	-0.2807	-0.4822
TVARGTERL		452	460	-0.2649	-0.3852	-0.2722	-0.2671	-0.4813		-0.2649	-0.3852	-0.2722	-0.2671	-0.4813
RITPTPGHTND		461	471	-0.123	-0.069	0.0961	0.5138	0.5027		-0.123	-0.069	0.0961	0.5138	0.5027
RITPTPGHTNDL		461	472	-0.1384	0.0508	0.1013	0.5705	0.482		-0.1384	0.0508	0.1013	0.5705	0.482
RITPTPGHTNDLSD	*	461	474	-0.1101	0.1448	0.3829	0.8949	0.6876		-0.1101	0.1448	0.3829	0.8949	0.6876
RITPTPGHTNDLSDIL		461	476	-0.0983	0.022	0.2398	1.2789	1.2283		-0.0983	0.022	0.2398	1.2789	1.2283
PGHTNDL		466	472	-0.1326	-0.0124	0.0469	0.1414	0.1163		-0.1326	-0.0124	0.0469	0.1414	0.1163
ILINAVD		475	481	-0.0116	-0.0319	0.0055	0.0079	0.0434		-0.0116	-0.0319	0.0055	0.0079	0.0434
ILINAVDDVF	*	475	484	-0.0256	-0.0184	-0.0066	0.0549	0.0599		-0.0256	-0.0184	-0.0066	0.0549	0.0599
VDDVFNE		480	486	-0.0512	0.0323	0.0293	0.0394	-0.0258		-0.0512	0.0323	0.0293	0.0394	-0.0258
LQLPRVRD		487	494	-0.1908	-0.143	-0.2202	-0.2427	-0.4406		-0.1908	-0.143	-0.2202	-0.2427	-0.4406
NELQLPRVRDWESQGGL	*	485	501	-0.1181	-0.02	0.0701	0.0081	-0.1776		-0.1181	-0.02	0.0701	0.0081	-0.1776
NELQLPRVRDWESQGGLL		485	502	-0.0363	0.1201	0.1456	0.0467	-0.1407		-0.0363	0.1201	0.1456	0.0467	-0.1407
LQLPRVRDWESQGGL		487	501	-0.1245	-0.0947	0.0337	-0.0585	-0.2809		-0.1245	-0.0947	0.0337	-0.0585	-0.2809
PRVRDWESQGGLL		490	502	-0.1962	-0.0427	0.0149	-0.0719	-0.1866		-0.1962	-0.0427	0.0149	-0.0719	-0.1866
PRVRDWESQGGLLG		490	503	-0.1497	0.0057	0.0306	0.0533	-0.2048		-0.1497	0.0057	0.0306	0.0533	-0.2048
NELQLPRVRDWESQGGLLGVGESGF		485	509	-0.0698	0.2066	0.2457	0.1544	-0.0245		-0.0698	0.2066	0.2457	0.1544	-0.0245
LQLPRVRDWESQGGLLGVGESGF		487	509	-0.0997	-0.0081	0.0078	-0.1787	-0.3499		-0.0997	-0.0081	0.0078	-0.1787	-0.3499
WESQGGL		495	501	-0.1718	-0.0837	-0.0175	-0.1284	-0.1905		-0.1718	-0.0837	-0.0175	-0.1284	-0.1905
WESQGGLL		495	502	-0.1936	-0.1596	-0.1009	-0.1227	-0.2657		-0.1936	-0.1596	-0.1009	-0.1227	-0.2657
PRVRDWESQGGLLGVGESG		490	508	-0.3613	-0.0761	-0.1294	-0.3094	-0.4924		-0.3613	-0.0761	-0.1294	-0.3094	-0.4924
WESQGGLLG		495	503	-0.2333	-0.1942	-0.1225	-0.1827	-0.3141		-0.2333	-0.1942	-0.1225	-0.1827	-0.3141
WESQGGLLGVGESG		495	508	-0.295	-0.0886	-0.1005	-0.1522	-0.3919		-0.295	-0.0886	-0.1005	-0.1522	-0.3919
WESQGGLLGVGESGF		495	509	-0.098	0.2047	0.1578	0.1008	-0.121		-0.098	0.2047	0.1578	0.1008	-0.121
LGVGESG		502	508	-0.1625	-0.2207	-0.1422	-0.1235	-0.1492		-0.1625	-0.2207	-0.1422	-0.1235	-0.1492
LGVGESGF	*	502	509	-0.1345	-0.0411	0.0149	-0.0571	-0.1893		-0.1345	-0.0411	0.0149	-0.0571	-0.1893
GVGESGF		503	509	-0.0727	-0.0251	0.0106	-0.078	-0.1717		-0.0727	-0.0251	0.0106	-0.078	-0.1717
FVEESNL		509	515	-0.2394	-0.1622	-0.1473	-0.2602	-0.2803		-0.2394	-0.1622	-0.1473	-0.2602	-0.2803
LSLTNDDLNPNVRD		521	534	-0.1361	-0.0799	0.0779	0.5063	0.4634		-0.1361	-0.0799	0.0779	0.5063	0.4634
SLTNDDLNPNVRD		522	534	-0.1547	-0.0654	0.0406	0.4981	0.3908		-0.1547	-0.0654	0.0406	0.4981	0.3908
TNDDLNPNVRD		524	534	-0.156	-0.1242	0.0378	0.5165	0.5942		-0.156	-0.1242	0.0378	0.5165	0.5942
LSLTNDDLNPNVRDPIVKQ		521	539	-0.2614	-0.138	-0.0331	0.3991	0.3005		-0.2614	-0.138	-0.0331	0.3991	0.3005
LSLTNDDLNPNVRDPIVKQL	*	521	540	-0.0702	0.0055	0.1299	0.6446	0.6414		-0.0702	0.0055	0.1299	0.6446	0.6414
SLTNDDLNPNVRDPIVKQ		522	539	-0.3846	-0.2563	-0.144	0.2486	0.2331		-0.3846	-0.2563	-0.144	0.2486	0.2331
DLNPNVRD		527	534	-0.1467	-0.0913	0.1109	0.5545	0.571		-0.1467	-0.0913	0.1109	0.5545	0.571
SLTNDDLNPNVRDPIVKQL		522	540	-0.0569	0.0927	0.1559	0.5621	0.5316		-0.0569	0.0927	0.1559	0.5621	0.5316
SLTNDDLNPNVRDPIVKQLE		522	541	-0.0156	0.0377	0.2478	0.7643	0.7395		-0.0156	0.0377	0.2478	0.7643	0.7395
TNDDLNPNVRDPIVKQ		524	539	-0.0446	-0.0538	0.2447	0.4632	0.5781		-0.0446	-0.0538	0.2447	0.4632	0.5781
DLNPNVRDPIVKQ		527	539	-0.1305	-0.1062	0.1041	0.5335	0.568		-0.1305	-0.1062	0.1041	0.5335	0.568
DLNPNVRDPIVKQLE		527	541	-0.2622		0.0657	0.5849	0.4906		-0.2622	100	0.0657	0.5849	0.4906
NPNVRDPIVKQ		529	539	-0.1255	0.0174	0.1131	0.4142	0.5419		-0.1255	0.0174	0.1131	0.4142	0.5419
PIVKQLE		535	541	0.0239	0.0321	0.1424	0.0514	0.0733		0.0239	0.0321	0.1424	0.0514	0.0733
LEVSSGIKQ		540	548	-0.2704	-0.2289	-0.1204	-0.1496	-0.1157		-0.2704	-0.2289	-0.1204	-0.1496	-0.1157
EVSSGIKQ	*	541	548	-0.2115	-0.1552	-0.067	-0.0785	0.0721		-0.2115	-0.1552	-0.067	-0.0785	0.0721

## Sheet: PLP, ALAS-holo+mtClpX+ATP
(holo d34-ALAS + mtClpX + ATP + PLP) - (holo d34-ALAS + mtClpX + ATP) raw numbers below, formatted map to the right, (30s, 5m, 10m, 30m, 60m										uptake difference scale (Da)
Deuterium uptake difference of peptides (daltons): numbers displayed at left, corresponding heat map to the right										-2.01	-1.51	-1.01	-0.51	0.49	0.51	1.01	1.51	2.1
										< -2.0	< -1.5	< -1.0	< -0.5	0	>0.5	>1.0	>1.5	>2.0
				time (min)						time (min)
sequence	linear	start	end	0.5	5	10	30	60		0.5	5	10	30	60
ATATGAGAA		35	43	-0.0953	0.2023	0.0361	0.0409	0.099		-0.0953	0.2023	0.0361	0.0409	0.099
ATATGAGAAAAT	*	35	46	0.0511	0.1105	0.1517	-0.0351	-0.0283		0.0511	0.1105	0.1517	-0.0351	-0.0283
ATGAGAAAATA		37	47	-0.0216	0.1122	0.2199	-0.0766	0.0127		-0.0216	0.1122	0.2199	-0.0766	0.0127
ATATGAGAAAATATASST		35	52	-0.2333	0.1315	-0.108	-0.0545	0.0729		-0.2333	0.1315	-0.108	-0.0545	0.0729
ATATGAGAAAATATASSTHAAA		35	56	-0.0156	-0.0853	-0.0455	-0.036	-0.158		-0.0156	-0.0853	-0.0455	-0.036	-0.158
ATATGAGAAAATATASSTHAAAA		35	57	-0.0528	-0.0608	-0.1494	-0.1026	-0.0316		-0.0528	-0.0608	-0.1494	-0.1026	-0.0316
ATATGAGAAAATATASSTHAAAAA		35	58	-0.2569	-0.1352	-0.1935	-0.3237	-0.07		-0.2569	-0.1352	-0.1935	-0.3237	-0.07
ATATGAGAAAATATASSTHAAAAAAA		35	60	0.0243	0.1123	-0.207	0.0341	-0.2306		0.0243	0.1123	-0.207	0.0341	-0.2306
ATATGAGAAAATATASSTHAAAAAAAAAN		35	63	-0.0032	0.3949	-0.3571	-0.1697	0.0199		-0.0032	0.3949	-0.3571	-0.1697	0.0199
AATATASSTHAAA		44	56	-0.1465	-0.0679	0.0401	0.0554	-0.0752		-0.1465	-0.0679	0.0401	0.0554	-0.0752
AATATASSTHAAAAAAAAANHSTQESGF		44	71	-0.0415	-0.3533	-0.2798	-0.1971	-0.2711		-0.0415	-0.3533	-0.2798	-0.1971	-0.2711
TATASSTHAAAAAAAAANHSTQESGF		46	71	0.0722	-0.2709	-0.2217	-0.0613	-0.194		0.0722	-0.2709	-0.2217	-0.0613	-0.194
ATASSTHAAAAAAAAANHSTQESGF	*	47	71	0.0816	-0.078	-0.0794	-0.0571	-0.1316		0.0816	-0.078	-0.0794	-0.0571	-0.1316
TASSTHAAAAAAAAANHSTQESGF		48	71	-0.1816	-0.2208	-0.2328	-0.0445	-0.1469		-0.1816	-0.2208	-0.2328	-0.0445	-0.1469
ASSTHAAAAAAAAANHSTQESGF		49	71	-0.1004	-0.1196	-0.1765	-0.1231	-0.2245		-0.1004	-0.1196	-0.1765	-0.1231	-0.2245
HAAAAAAAAANHSTQESGF		53	71	-0.1373	-0.1749	-0.1535	-0.1635	-0.1727		-0.1373	-0.1749	-0.1535	-0.1635	-0.1727
HAAAAAAAAANHSTQESGFD		53	72	-0.13	-0.2322	-0.2185	-0.2401	-0.1106		-0.13	-0.2322	-0.2185	-0.2401	-0.1106
AAAAAANHSTQESGF		57	71	-0.0947	0.0554	-0.0184	-0.0187	-0.1472		-0.0947	0.0554	-0.0184	-0.0187	-0.1472
AAAAAANHSTQESGFD		57	72	-0.1789	-0.1497	0.0325	-0.0762	-0.0148		-0.1789	-0.1497	0.0325	-0.0762	-0.0148
AAAAANHSTQESGF		58	71	-0.2272	0.1046	0.0245	0.0828	-0.0547		-0.2272	0.1046	0.0245	0.0828	-0.0547
AAAANHSTQESGF		59	71	0.0023	0.1604	0.1012	0.2103	0.1024		0.0023	0.1604	0.1012	0.2103	0.1024
AAANHSTQESGF		60	71	-0.0457	-0.0097	0.099	0.183	0.111		-0.0457	-0.0097	0.099	0.183	0.111
AAANHSTQESGFD		60	72	-0.1172	0.0578	0.1162	0.1725	0.0537		-0.1172	0.0578	0.1162	0.1725	0.0537
AANHSTQESGF		61	71	-0.0131	0.0216	0.1596	0.1093	0.0862		-0.0131	0.0216	0.1596	0.1093	0.0862
AANHSTQESGFD		61	72	-0.1695	-0.0578	0.0582	-0.0161			-0.1695	-0.0578	0.0582	-0.0161	100
HSTQESGF		64	71	-0.1121	0.0974	0.2459	0.1253	0.0931		-0.1121	0.0974	0.2459	0.1253	0.0931
HSTQESGFD		64	72	-0.0766	-0.0388	0.0215	-0.0409	-0.0056		-0.0766	-0.0388	0.0215	-0.0409	-0.0056
DYEGLID		72	78	0.0507	-0.0448	0.1664	-0.0527	0.0134		0.0507	-0.0448	0.1664	-0.0527	0.0134
DYEGLIDSE		72	80	0.0107	-0.2687	0.0332	-0.0973	0.0309		0.0107	-0.2687	0.0332	-0.0973	0.0309
DYEGLIDSEL	*	72	81	-0.0627	-0.157	0.0511	-0.1204	0.1136		-0.0627	-0.157	0.0511	-0.1204	0.1136
YEGLIDSEL		73	81	-0.015	-0.2071	-0.1777	-0.299	-0.0811		-0.015	-0.2071	-0.1777	-0.299	-0.0811
EGLIDSEL		74	81	0.0487	-0.148	0.1447	-0.0586	-0.065		0.0487	-0.148	0.1447	-0.0586	-0.065
IDSELQKKRLDKS		77	89	-0.0089	-0.3467	-0.0874	0.0101	0.036		-0.0089	-0.3467	-0.0874	0.0101	0.036
SELQKKRLDKS		79	89	0.006	-0.1833	0.0264	-0.0853	0.1324		0.006	-0.1833	0.0264	-0.0853	0.1324
ELQKKRLDKS		80	89	-0.0913	-0.2586	-0.0734	-0.0442	-0.0386		-0.0913	-0.2586	-0.0734	-0.0442	-0.0386
DYEGLIDSELQKKRLDKSYRYFNNINRL		72	99	-0.1534	-0.9383	0.2688	-0.4817	-0.0814		-0.1534	-0.9383	0.2688	-0.4817	-0.0814
QKKRLDKS	*	82	89	0.0952	-0.0836	0.034	0.061	0.0253		0.0952	-0.0836	0.034	0.061	0.0253
KKRLDKS		83	89	-0.0506	-0.2374	0.0062	0.0726	0.0511		-0.0506	-0.2374	0.0062	0.0726	0.0511
QKKRLDKSYRY		82	92	-0.2512	-0.1974	-0.1107	0.1025	-0.1632		-0.2512	-0.1974	-0.1107	0.1025	-0.1632
QKKRLDKSYRYFNNINRL		82	99	-0.0735	-0.4244	0.3493	-0.1409	-0.1265		-0.0735	-0.4244	0.3493	-0.1409	-0.1265
YRYFNNI		90	96	-0.1809	-0.1984	-0.082	-0.0666	-0.1168		-0.1809	-0.1984	-0.082	-0.0666	-0.1168
FNNINRL	*	93	99	0.1872	-0.1224	0.3091	-0.1347	0.1659		0.1872	-0.1224	0.3091	-0.1347	0.1659
YRYFNNINRLAKEFPLAHRQREAD		90	113	0.1067	-0.8671	0.3746	-0.3482	-0.234		0.1067	-0.8671	0.3746	-0.3482	-0.234
KEFPLAHRQREAD	*	101	113	0.2685	-0.0192	0.1644	0.1039	0.0644		0.2685	-0.0192	0.1644	0.1039	0.0644
FPLAHRQREAD		103	113	0.0763	-0.02	0.1598	0.0345	0.057		0.0763	-0.02	0.1598	0.0345	0.057
AKEFPLAHRQREADKVTV		100	117	0.1359	-0.2689	0.2588	-0.22	-0.0097		0.1359	-0.2689	0.2588	-0.22	-0.0097
FPLAHRQREADKVTVW		103	118	0.0903	-0.2858	0.219	-0.3797	0.0035		0.0903	-0.2858	0.219	-0.3797	0.0035
PLAHRQREADKVTVW		104	118	-0.0994	-0.0483	0.2175	-0.3443	-0.0802		-0.0994	-0.0483	0.2175	-0.3443	-0.0802
KVTVWCSND	*	114	122	0.1578	-0.0526	0.1638	-0.133	0.1195		0.1578	-0.0526	0.1638	-0.133	0.1195
KVTVWCSNDY		114	123	0.0085	-0.204	0.0162	-0.407	0.0454		0.0085	-0.204	0.0162	-0.407	0.0454
YLALSKHPEVL	*	123	133	-0.0543	0.0332	-0.0013	-0.4003	-0.0922		-0.0543	0.0332	-0.0013	-0.4003	-0.0922
LALSKHPEVL		124	133	0.0711	0.1069	0.1299	-0.3888	-0.0941		0.0711	0.1069	0.1299	-0.3888	-0.0941
DAMHKTID		134	141	0.1917	-0.0818	0.0491	-0.2041	0.0982		0.1917	-0.0818	0.0491	-0.2041	0.0982
DAMHKTIDKYGCG	*	134	146	0.1289	0.0849	0.2819	-0.5632	0.0731		0.1289	0.0849	0.2819	-0.5632	0.0731
HKTIDKYGCG		137	146	0.3049	-0.0397	0.2082	-0.3314	0.0399		0.3049	-0.0397	0.2082	-0.3314	0.0399
DAMHKTIDKYGCGAGGTRN		134	152	0.4182	0.2048	0.3344	-0.9547	-0.106		0.4182	0.2048	0.3344	-0.9547	-0.106
HKTIDKYGCGAGGTRN		137	152	0.5537	-0.1256	0.5337	-0.8474	-0.2741		0.5537	-0.1256	0.5337	-0.8474	-0.2741
AGGTRNIAGHNIPTLNL		147	163	0.0048	-0.1964	0.3204	-0.4995	-0.1629		0.0048	-0.1964	0.3204	-0.4995	-0.1629
LATLHKKEGAL		167	177	0.0909	0.0479	0.0292	0.0824	-0.0928		0.0909	0.0479	0.0292	0.0824	-0.0928
LATLHKKEGALVF		167	179	0.0816	0.0803	0.0927	0.0509	-0.0228		0.0816	0.0803	0.0927	0.0509	-0.0228
TLHKKEGAL		169	177	0.1198	0.0147	0.0208	-0.0147	-0.0191		0.1198	0.0147	0.0208	-0.0147	-0.0191
ATLHKKEGALVF	*	168	179	0.0171	0.0038	0.0147	-0.0168	-0.0645		0.0171	0.0038	0.0147	-0.0168	-0.0645
LHKKEGAL		170	177	0.0151	-0.022	-0.0771	-0.0645	-0.1568		0.0151	-0.022	-0.0771	-0.0645	-0.1568
HKKEGAL		171	177	0.1305	0.0241	-0.0319	-0.0466	-0.1189		0.1305	0.0241	-0.0319	-0.0466	-0.1189
HKKEGALVF		171	179	0.0578	-0.0064	0.0822	0.013	-0.0137		0.0578	-0.0064	0.0822	0.013	-0.0137
VANDAVL	*	184	190	0.029	0.0429	0.1236	-0.1522	-0.1075		0.029	0.0429	0.1236	-0.1522	-0.1075
SLLGQKMKD	*	191	199	0.0948	0.0546	0.061	-0.2414	-0.2791		0.0948	0.0546	0.061	-0.2414	-0.2791
LLGQKMKD		192	199	0.061	0.0368	-0.0022	-0.1806	-0.19		0.061	0.0368	-0.0022	-0.1806	-0.19
LGQKMKD		193	199	-0.0172	-0.0356	0.0261	-0.3758	-0.1776		-0.0172	-0.0356	0.0261	-0.3758	-0.1776
LVIFSDELNHASM	*	200	212	-0.1182	-0.1169	-0.0472	-0.3311	-0.1482		-0.1182	-0.1169	-0.0472	-0.3311	-0.1482
VIFSDELNHASM		201	212	-0.0509	-0.1131	-0.0743	-0.4401	-0.2973		-0.0509	-0.1131	-0.0743	-0.4401	-0.2973
FSDELNHASM		203	212	0.0536	0.0269	0.1081	-0.2945	-0.1347		0.0536	0.0269	0.1081	-0.2945	-0.1347
SDELNHASM		204	212	0.0502	-0.0582	0.0016	-0.327	-0.1533		0.0502	-0.0582	0.0016	-0.327	-0.1533
IVGIKHANVKKHIFKHNDLNEL		213	234	-0.1867		-0.2037	-0.1593	-0.235		-0.1867	100	-0.2037	-0.1593	-0.235
LEQLLQSYPKSVPKL		234	248	-0.0977	-0.1208	-0.0657	-0.0754	-0.1369		-0.0977	-0.1208	-0.0657	-0.0754	-0.1369
EQLLQSYPKSVPKL		235	248	-0.072	-0.1232	-0.1393	-0.0981	-0.1344		-0.072	-0.1232	-0.1393	-0.0981	-0.1344
LEQLLQSYPKSVPKLIA	*	234	250	-0.1485	-0.1815	-0.1365	-0.1285	-0.1955		-0.1485	-0.1815	-0.1365	-0.1285	-0.1955
EQLLQSYPKSVPKLIA		235	250	-0.1834	-0.2598	-0.2464	-0.1778	-0.2713		-0.1834	-0.2598	-0.2464	-0.1778	-0.2713
LLQSYPKSVPKL		237	248	0.0257	-0.0579	-0.0275	0.0182	0.0413		0.0257	-0.0579	-0.0275	0.0182	0.0413
LLQSYPKSVPKLIA		237	250	0.1045	-0.0064	0.0501	-0.0643	-0.0649		0.1045	-0.0064	0.0501	-0.0643	-0.0649
QSYPKSVPKLIA		239	250	0.0856	0.0976	0.0694	0.0491	0.0411		0.0856	0.0976	0.0694	0.0491	0.0411
YPKSVPKL		241	248	0.0083	-0.0024	-0.0311	-0.0434	-0.094		0.0083	-0.0024	-0.0311	-0.0434	-0.094
YSMAGSV	*	255	261	-0.0138	-0.0739	-0.0561	-0.1823	0.0615		-0.0138	-0.0739	-0.0561	-0.1823	0.0615
YSMAGSVA		255	262	-0.0016	-0.0585	-0.0919	-0.0715	-0.0885		-0.0016	-0.0585	-0.0919	-0.0715	-0.0885
YSMAGSVAD		255	263	0.0182	-0.0519	-0.0618	-0.0831	-0.0347		0.0182	-0.0519	-0.0618	-0.0831	-0.0347
YSMAGSVADI		255	264	0.0502	-0.0203	-0.0187	-0.0155	-0.0971		0.0502	-0.0203	-0.0187	-0.0155	-0.0971
GSVADIE		259	265	0.0107	-0.06	-0.0045	0.0493	0.0423		0.0107	-0.06	-0.0045	0.0493	0.0423
ADIEKICDL	*	262	270	-0.0747	-0.0948	-0.0597	-0.1262	-0.1134		-0.0747	-0.0948	-0.0597	-0.1262	-0.1134
DIEKICD		263	269	0.0354	-0.0284	0.024	-0.0274	-0.0074		0.0354	-0.0284	0.024	-0.0274	-0.0074
LADKYGAL		270	277	0.1297	0.0464	0.0481	0.0209	0.0295		0.1297	0.0464	0.0481	0.0209	0.0295
LADKYGALT		270	278	0.1245	-0.0556	-0.0358	0.0261	-0.0713		0.1245	-0.0556	-0.0358	0.0261	-0.0713
ADKYGAL		271	277	0.179	0.0626	0.0496	0.0924	0.1291		0.179	0.0626	0.0496	0.0924	0.1291
ADKYGALTF	*	271	279	0.1124	-0.0032	0.0155	0.0247	0.0287		0.1124	-0.0032	0.0155	0.0247	0.0287
TFLDEVHAVGL		278	288	-0.04	-0.0093	0.0454	0.0039	-0.046		-0.04	-0.0093	0.0454	0.0039	-0.046
LDEVHAVGL	*	280	288	0.1221	0.0362	0.0417	0.0071	-0.0067		0.1221	0.0362	0.0417	0.0071	-0.0067
DEVHAVGLYGPHGAG		281	295	-0.0053	-0.0182	-0.0269	-0.2199	-0.1517		-0.0053	-0.0182	-0.0269	-0.2199	-0.1517
LDEVHAVGLYGPHGAGVAE		280	298	-0.1094	-0.0175	-0.0338	-0.0437	-0.0476		-0.1094	-0.0175	-0.0338	-0.0437	-0.0476
DEVHAVGLYGPHGAGVAE		281	298	-0.1334	-0.0809	-0.0631	-0.073	-0.107		-0.1334	-0.0809	-0.0631	-0.073	-0.107
VGLYGPHGAGVAE		286	298	0.1589	0.134	0.0824	0.0687	0.0611		0.1589	0.134	0.0824	0.0687	0.0611
YGPHGAG		289	295	0.1146	0.0706	0.098	0.0518	0.0519		0.1146	0.0706	0.098	0.0518	0.0519
LYGPHGAGVAE		288	298	0.108	0.0043	-0.0133	-0.0253	-0.0016		0.108	0.0043	-0.0133	-0.0253	-0.0016
YGPHGAGVAE		289	298	-0.0047	-0.0094	0.0154	0.0325	0.0107		-0.0047	-0.0094	0.0154	0.0325	0.0107
YGPHGAGVAEHCDF	*	289	302	-0.2262	-0.1361	-0.1469	-0.2192	-0.2207		-0.2262	-0.1361	-0.1469	-0.2192	-0.2207
VAEHCDF		296	302	0.022	0.0404	-0.0118	0.0014	-0.0837		0.022	0.0404	-0.0118	0.0014	-0.0837
ESHRASGIAT		303	312	0.1605	0.0267	-0.0637	-0.1126	-0.0513		0.1605	0.0267	-0.0637	-0.1126	-0.0513
ESHRASGIATPKTNDKGGAKTVMD	*	303	326	0.0105	-0.0689	-0.1183	-0.0643	-0.1879		0.0105	-0.0689	-0.1183	-0.0643	-0.1879
IATPKTNDKGGAKTVM		310	325	-0.3302	0.0623	0.0094	0.0664	-0.0425		-0.3302	0.0623	0.0094	0.0664	-0.0425
IATPKTNDKGGAKTVMD		310	326	-0.1919	0.3785	0.2773	0.3823	0.2053		-0.1919	0.3785	0.2773	0.3823	0.2053
ATPKTNDKGGAKTVM		311	325	-0.0519	0.0945	0.003	0.1077	-0.1772		-0.0519	0.0945	0.003	0.1077	-0.1772
DRVDMIT		326	332	0.0473	0.0288	0.0311	0.0319	0.0258		0.0473	0.0288	0.0311	0.0319	0.0258
DRVDMITGTLG	*	326	336	-0.0032	0.0161	0.0043	-0.0739	-0.1932		-0.0032	0.0161	0.0043	-0.0739	-0.1932
DRVDMITGTLGKSFGSVGG		326	344	-0.0945	-0.2789	-0.4325	-1.6855	-0.8801		-0.0945	-0.2789	-0.4325	-1.6855	-0.8801
ITGTLGKSF		331	339	0.3394	-0.0783	-0.1923	-0.8509	-0.3487		0.3394	-0.0783	-0.1923	-0.8509	-0.3487
DRVDMITGTLGKSFGSVGGY		326	345	-0.1564	-0.2024	-0.4872	-1.9249	-1.2227		-0.1564	-0.2024	-0.4872	-1.9249	-1.2227
RVDMITGTLGKSFGSVGGY		327	345	-0.0626	-0.2494	-0.2776	-1.7438	-1.138		-0.0626	-0.2494	-0.2776	-1.7438	-1.138
DRVDMITGTLGKSFGSVGGYVAA		326	348	-0.1728	-0.3731	-0.7358	-1.7202	-0.9942		-0.1728	-0.3731	-0.7358	-1.7202	-0.9942
MITGTLGKSFGSVGGY		330	345	0.2063	-0.1224	0.0386	-1.469	-0.7185		0.2063	-0.1224	0.0386	-1.469	-0.7185
ITGTLGKSFGSVGG		331	344	0.6079	-0.1096	-0.1544	-0.9127	-0.5272		0.6079	-0.1096	-0.1544	-0.9127	-0.5272
GTLGKSFGSVGG		333	344	0.3914	-0.0817	0.1007	-0.769	-0.4033		0.3914	-0.0817	0.1007	-0.769	-0.4033
ITGTLGKSFGSVGGYVAA		331	348	-0.021	-0.212	-0.2792	-1.2528	-0.8605		-0.021	-0.212	-0.2792	-1.2528	-0.8605
GKSFGSVGGYVAA	*	336	348	0.0237	0.2075	0.0988	-0.3572	-0.1692		0.0237	0.2075	0.0988	-0.3572	-0.1692
FGSVGGY		339	345	0.2271	0.0684	0.1037	-0.1145	-0.0962		0.2271	0.0684	0.1037	-0.1145	-0.0962
ITGTLGKSFGSVGGYVAASRKLIDW		331	355	-0.2186	-0.4026	-0.5801	-0.8823	-0.7486		-0.2186	-0.4026	-0.5801	-0.8823	-0.7486
GTLGKSFGSVGGYVAASRKLIDW		333	355	-0.1414	-0.3687	-0.3469	-1.1694	-0.7932		-0.1414	-0.3687	-0.3469	-1.1694	-0.7932
GKSFGSVGGYVAASRKLIDW		336	355	-0.0686		-0.1167	-0.3218	-0.1947		-0.0686	100	-0.1167	-0.3218	-0.1947
YVAASRKLIDW		345	355	0.0508	0.0546	-0.0495	-0.058	-0.0401		0.0508	0.0546	-0.0495	-0.058	-0.0401
VAASRKLIDWF		346	356	0.0815	-0.0882	0.0122	-0.0532	-0.0582		0.0815	-0.0882	0.0122	-0.0532	-0.0582
AASRKLIDW		347	355	0.0034	-0.1345	-0.0868	-0.1629	-0.1429		0.0034	-0.1345	-0.0868	-0.1629	-0.1429
ASRKLIDW		348	355	0.2016	-0.01	-0.0221	-0.0102	-0.077		0.2016	-0.01	-0.0221	-0.0102	-0.077
SRKLIDWF	*	349	356	0.1091	-0.0118	-0.046	-0.0711	-0.048		0.1091	-0.0118	-0.046	-0.0711	-0.048
FRSFAPGF	*	356	363	0.0927	-0.0236	0.0631	-0.2959	-0.061		0.0927	-0.0236	0.0631	-0.2959	-0.061
FRSFAPGFI		356	364	0.1848	-0.0503	0.0966	-0.3181	-0.0415		0.1848	-0.0503	0.0966	-0.3181	-0.0415
RSFAPGF		357	363	0.1901	0.0317	-0.1259	-0.4173	-0.0646		0.1901	0.0317	-0.1259	-0.4173	-0.0646
IFTTTLPPSVM	*	364	374	0.1155	-0.56	-0.326	-0.2996	-0.0348		0.1155	-0.56	-0.326	-0.2996	-0.0348
FTTTLPPSVM		365	374	0.1851	0.0199	0.0372	-0.5646	-0.1673		0.1851	0.0199	0.0372	-0.5646	-0.1673
TTTLPPSVM		366	374	0.0655	-0.0268	0.084	-0.3629	-0.09		0.0655	-0.0268	0.084	-0.3629	-0.09
TTLPPSVM		367	374	0.1492	0.0411	0.0623	-0.4255	-0.1565		0.1492	0.0411	0.0623	-0.4255	-0.1565
MAGATAA	*	374	380	0.0444	-0.0297	0.0767	-0.0335	0.0323		0.0444	-0.0297	0.0767	-0.0335	0.0323
AGATAAIRYQRCHIDL		375	390	-0.1853	-0.1252	-0.1499	-0.2388	-0.2133		-0.1853	-0.1252	-0.1499	-0.2388	-0.2133
AAIRYQRC		379	386	-0.025	-0.0119	-0.069	-0.1301	-0.1602		-0.025	-0.0119	-0.069	-0.1301	-0.1602
AIRYQRC		380	386	0.0218	0.036	-0.0461	-0.0497	-0.1083		0.0218	0.036	-0.0461	-0.0497	-0.1083
AAIRYQRCHIDL		379	390	0.0315	0.0308	0.0575	-0.0603	-0.0026		0.0315	0.0308	0.0575	-0.0603	-0.0026
AIRYQRCHIDL		380	390	-0.1333	-0.0938	-0.1476	-0.228	-0.1696		-0.1333	-0.0938	-0.1476	-0.228	-0.1696
IRYQRCHIDL	*	381	390	-0.0335	-0.0331	-0.0575	-0.1291	-0.0983		-0.0335	-0.0331	-0.0575	-0.1291	-0.0983
HIDLRTSQQKHTM		387	399	0.0239	0.023	-0.0517	-0.1854	-0.1172		0.0239	0.023	-0.0517	-0.1854	-0.1172
HIDLRTSQQKHTMY		387	400	0.042	0.0497	0.057	-0.0493	-0.0181		0.042	0.0497	0.057	-0.0493	-0.0181
SQQKHTM		393	399	0.057	0.0655	0.0647	-0.0339	0.0322		0.057	0.0655	0.0647	-0.0339	0.0322
VKKAFHELGIPVIPNPSHIVPVL	*	401	423	0.1094	-0.09	0.0977	0.0252	-0.0376		0.1094	-0.09	0.0977	0.0252	-0.0376
HELGIPVIPNPSHIVPVL		406	423	0.381	0.1017	-0.016	-0.0483	0.0233		0.381	0.1017	-0.016	-0.0483	0.0233
LGIPVIPNPSHIVPVL		408	423	0.7056	0.0141	-0.0172	-0.1006	-0.0074		0.7056	0.0141	-0.0172	-0.1006	-0.0074
IPVIPNPSHIVPVL		410	423	1.0139	0.3046	0.0473	-0.0021	0.0804		1.0139	0.3046	0.0473	-0.0021	0.0804
PNPSHIVPVL		414	423	0.1478	0.047	0.0507	0.034	0.0874		0.1478	0.047	0.0507	0.034	0.0874
LAKQASDIL	*	429	437	0.1787	0.0458	0.1207	0.0908	0.0116		0.1787	0.0458	0.1207	0.0908	0.0116
AKQASDIL		430	437	0.1322	0.0437	0.0283	0.0309	0.0628		0.1322	0.0437	0.0283	0.0309	0.0628
LINKHQIY		437	444	0.202	0.0951	0.0302	0.0046	-0.0344		0.202	0.0951	0.0302	0.0046	-0.0344
ILINKHQIYVQ		436	446	0.028	-0.1085	-0.1763	-0.2681	-0.2478		0.028	-0.1085	-0.1763	-0.2681	-0.2478
INKHQIY		438	444	0.1671	0.027	-0.0006	0.0144	-0.1208		0.1671	0.027	-0.0006	0.0144	-0.1208
ILINKHQIYVQA		436	447	0.1398	0.0394	-0.0159	-0.1258	-0.1156		0.1398	0.0394	-0.0159	-0.1258	-0.1156
INKHQIYVQ	*	438	446	0.2084	0.0041	-0.0735	-0.1574	-0.0659		0.2084	0.0041	-0.0735	-0.1574	-0.0659
INFPTVA		448	454	-0.0369	0.0192	-0.0867	0.1249	0.0742		-0.0369	0.0192	-0.0867	0.1249	0.0742
AINFPTVARGTERL	*	447	460	-0.0723	-0.1038	-0.1478	-0.017	-0.013		-0.0723	-0.1038	-0.1478	-0.017	-0.013
PTVARGTERL		451	460	0.3509	0.2152	0.1375	0.1578	0.0998		0.3509	0.2152	0.1375	0.1578	0.0998
TVARGTERL		452	460	0.3463	0.1804	0.0933	0.1433	0.1155		0.3463	0.1804	0.0933	0.1433	0.1155
RITPTPGHTND		461	471	0.142	0.0467	0.0929	-0.03	0.0461		0.142	0.0467	0.0929	-0.03	0.0461
RITPTPGHTNDL		461	472	0.213	-0.023	0.1594	0.0402	0.1383		0.213	-0.023	0.1594	0.0402	0.1383
RITPTPGHTNDLSD	*	461	474	0.1178	-0.1178	0.0232	-0.1185	-0.0905		0.1178	-0.1178	0.0232	-0.1185	-0.0905
RITPTPGHTNDLSDIL		461	476	0.1005	-0.0745	0.0757	-0.3807	-0.2388		0.1005	-0.0745	0.0757	-0.3807	-0.2388
PGHTNDL		466	472	0.074	-0.0176	0.0556	0.0645	0.0967		0.074	-0.0176	0.0556	0.0645	0.0967
ILINAVD		475	481	-0.0201	-0.0297	-0.074	-0.0601	-0.1226		-0.0201	-0.0297	-0.074	-0.0601	-0.1226
ILINAVDDVF	*	475	484	0.0061	0.0113	-0.007	-0.0231	-0.0552		0.0061	0.0113	-0.007	-0.0231	-0.0552
VDDVFNE		480	486	0.0637	-0.0723	-0.0188	-0.0318	-0.0529		0.0637	-0.0723	-0.0188	-0.0318	-0.0529
LQLPRVRD		487	494	0.0498	-0.0052	-0.1474	-0.1889	-0.1895		0.0498	-0.0052	-0.1474	-0.1889	-0.1895
NELQLPRVRDWESQGGL	*	485	501	-0.0323	-0.0941	-0.2241	-0.248	-0.3334		-0.0323	-0.0941	-0.2241	-0.248	-0.3334
NELQLPRVRDWESQGGLL		485	502	-0.0751	-0.2112	-0.3021	-0.2922	-0.4043		-0.0751	-0.2112	-0.3021	-0.2922	-0.4043
LQLPRVRDWESQGGL		487	501	0.0202	0.0295	-0.0916	-0.15	-0.168		0.0202	0.0295	-0.0916	-0.15	-0.168
PRVRDWESQGGLL		490	502	-0.0505	-0.0324	-0.083	-0.0268	-0.1003		-0.0505	-0.0324	-0.083	-0.0268	-0.1003
PRVRDWESQGGLLG		490	503	-0.0377	-0.0961	-0.0435	-0.1305	-0.1499		-0.0377	-0.0961	-0.0435	-0.1305	-0.1499
NELQLPRVRDWESQGGLLGVGESGF		485	509	-0.0756	-0.2497	-0.2211	-0.2899	-0.414		-0.0756	-0.2497	-0.2211	-0.2899	-0.414
LQLPRVRDWESQGGLLGVGESGF		487	509	-0.0403	-0.1408	-0.0825	-0.0773	-0.1608		-0.0403	-0.1408	-0.0825	-0.0773	-0.1608
WESQGGL		495	501	-0.0759	0.0462	0.002	0.0647	-0.0064		-0.0759	0.0462	0.002	0.0647	-0.0064
WESQGGLL		495	502	-0.0967	0.0089	-0.059	0.0208	-0.0008		-0.0967	0.0089	-0.059	0.0208	-0.0008
PRVRDWESQGGLLGVGESG		490	508	-0.0092	-0.2416	-0.0199	0.0628	-0.2176		-0.0092	-0.2416	-0.0199	0.0628	-0.2176
WESQGGLLG		495	503	-0.0325	0.0492	-0.014	0.0534	-0.1435		-0.0325	0.0492	-0.014	0.0534	-0.1435
WESQGGLLGVGESG		495	508	0.0624	0.02	0.0679	0.1277	0.0087		0.0624	0.02	0.0679	0.1277	0.0087
WESQGGLLGVGESGF		495	509	-0.0403	-0.1916	-0.166	-0.0148	0.1432		-0.0403	-0.1916	-0.166	-0.0148	0.1432
LGVGESG		502	508	0.0091	0.2289	0.1824	0.1806	0.1792		0.0091	0.2289	0.1824	0.1806	0.1792
LGVGESGF	*	502	509	-0.1052	-0.016	-0.0131	0.0432	0.0098		-0.1052	-0.016	-0.0131	0.0432	0.0098
GVGESGF		503	509	-0.1631	-0.0376	-0.0437	0.0275	-0.0065		-0.1631	-0.0376	-0.0437	0.0275	-0.0065
FVEESNL		509	515	0.1418	0.0744	0.0431	0.1292	0.0943		0.1418	0.0744	0.0431	0.1292	0.0943
LSLTNDDLNPNVRD		521	534	0.1517	0.0925	0.0506	-0.1708	-0.17		0.1517	0.0925	0.0506	-0.1708	-0.17
SLTNDDLNPNVRD		522	534	0.0789	-0.0487	-0.002	-0.1811	-0.1317		0.0789	-0.0487	-0.002	-0.1811	-0.1317
TNDDLNPNVRD		524	534	0.1793	0.0545	0.0117	-0.2107	-0.0806		0.1793	0.0545	0.0117	-0.2107	-0.0806
LSLTNDDLNPNVRDPIVKQ		521	539	0.1448	0.0375	0.037	-0.0273	-0.0213		0.1448	0.0375	0.037	-0.0273	-0.0213
LSLTNDDLNPNVRDPIVKQL	*	521	540	-0.0068	-0.1074	-0.168	-0.3728	-0.321		-0.0068	-0.1074	-0.168	-0.3728	-0.321
SLTNDDLNPNVRDPIVKQ		522	539	0.1878	0.1198	0.1374	0.0339	0.0019		0.1878	0.1198	0.1374	0.0339	0.0019
DLNPNVRD		527	534	0.1651	0.096	0.0406	-0.0593	0.0241		0.1651	0.096	0.0406	-0.0593	0.0241
SLTNDDLNPNVRDPIVKQL		522	540	-0.0085	-0.15	-0.092	-0.2165	-0.1886		-0.0085	-0.15	-0.092	-0.2165	-0.1886
SLTNDDLNPNVRDPIVKQLE		522	541	-0.0535	-0.0691	-0.1302	-0.333	-0.3328		-0.0535	-0.0691	-0.1302	-0.333	-0.3328
TNDDLNPNVRDPIVKQ		524	539	-0.0193	-0.0406	-0.2065	-0.1859	-0.1763		-0.0193	-0.0406	-0.2065	-0.1859	-0.1763
DLNPNVRDPIVKQ		527	539	0.0546	0.0437	-0.0478	-0.167	-0.1427		0.0546	0.0437	-0.0478	-0.167	-0.1427
DLNPNVRDPIVKQLE		527	541	0.038		0.0569	-0.2491	-0.1144		0.038	100	0.0569	-0.2491	-0.1144
NPNVRDPIVKQ		529	539	0.0951	0.0596	0.0307	-0.0231	-0.0118		0.0951	0.0596	0.0307	-0.0231	-0.0118
PIVKQLE		535	541	-0.1971	0.068	-0.0416	0.0963	-0.0237		-0.1971	0.068	-0.0416	0.0963	-0.0237
LEVSSGIKQ		540	548	0.1299	0.1546	0.1401	0.1758	0.1082		0.1299	0.1546	0.1401	0.1758	0.1082
EVSSGIKQ	*	541	548	0.0091	0.0272	0.1978	-0.0093	0.1211		0.0091	0.0272	0.1978	-0.0093	0.1211
