# Supplementary figures and images for: Mitochondrial ClpX activates an essential biosynthetic enzyme through partial unfolding
Source: eLife journal article supplement (doi:10.7554/elife.54387), 2020-02-24

A

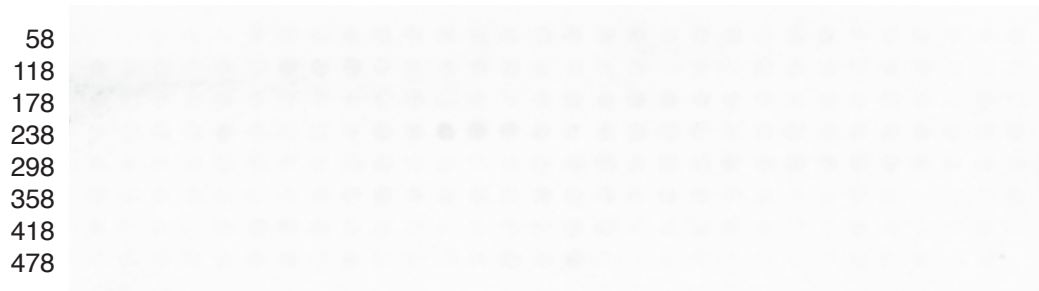

B

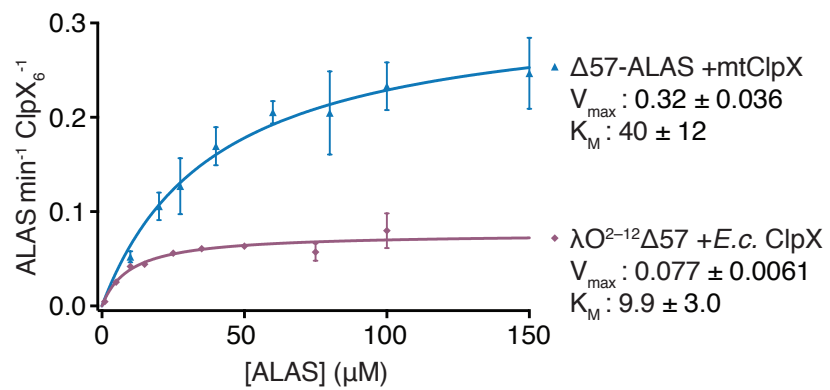

C

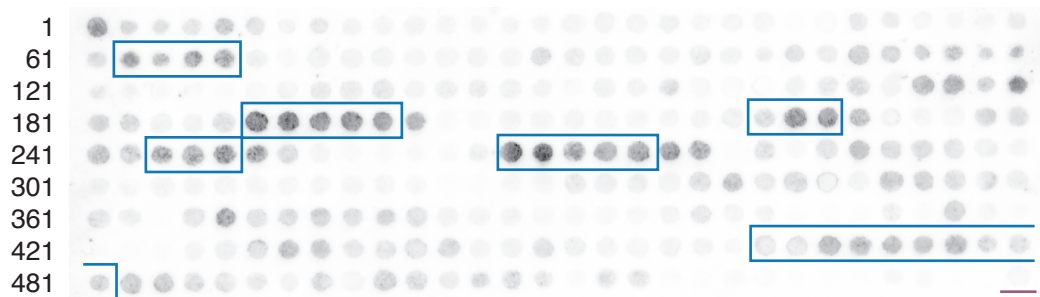

Figure 1—figure supplement 1

Supplement: supp [file elife_poa_e54387_Figure_1_figure_supplement_1.pdf › elife_poa_e54387_Figure_1_figure_supplement_1.pdf]

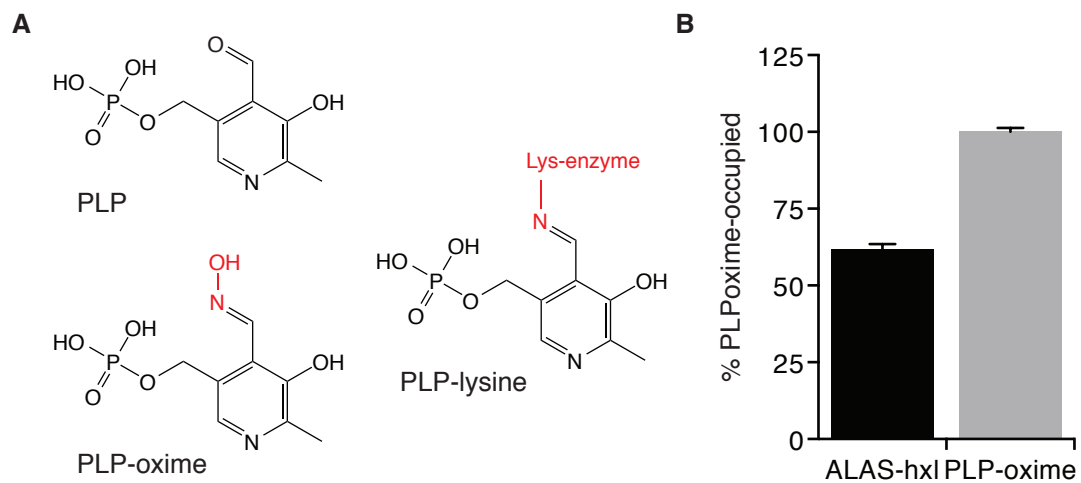

**Figure 1 —figure supplement 2**

Supplement: supp [file elife_poa_e54387_Figure_1_figure_supplement_2.pdf › elife_poa_e54387_Figure_1_figure_supplement_2.pdf]

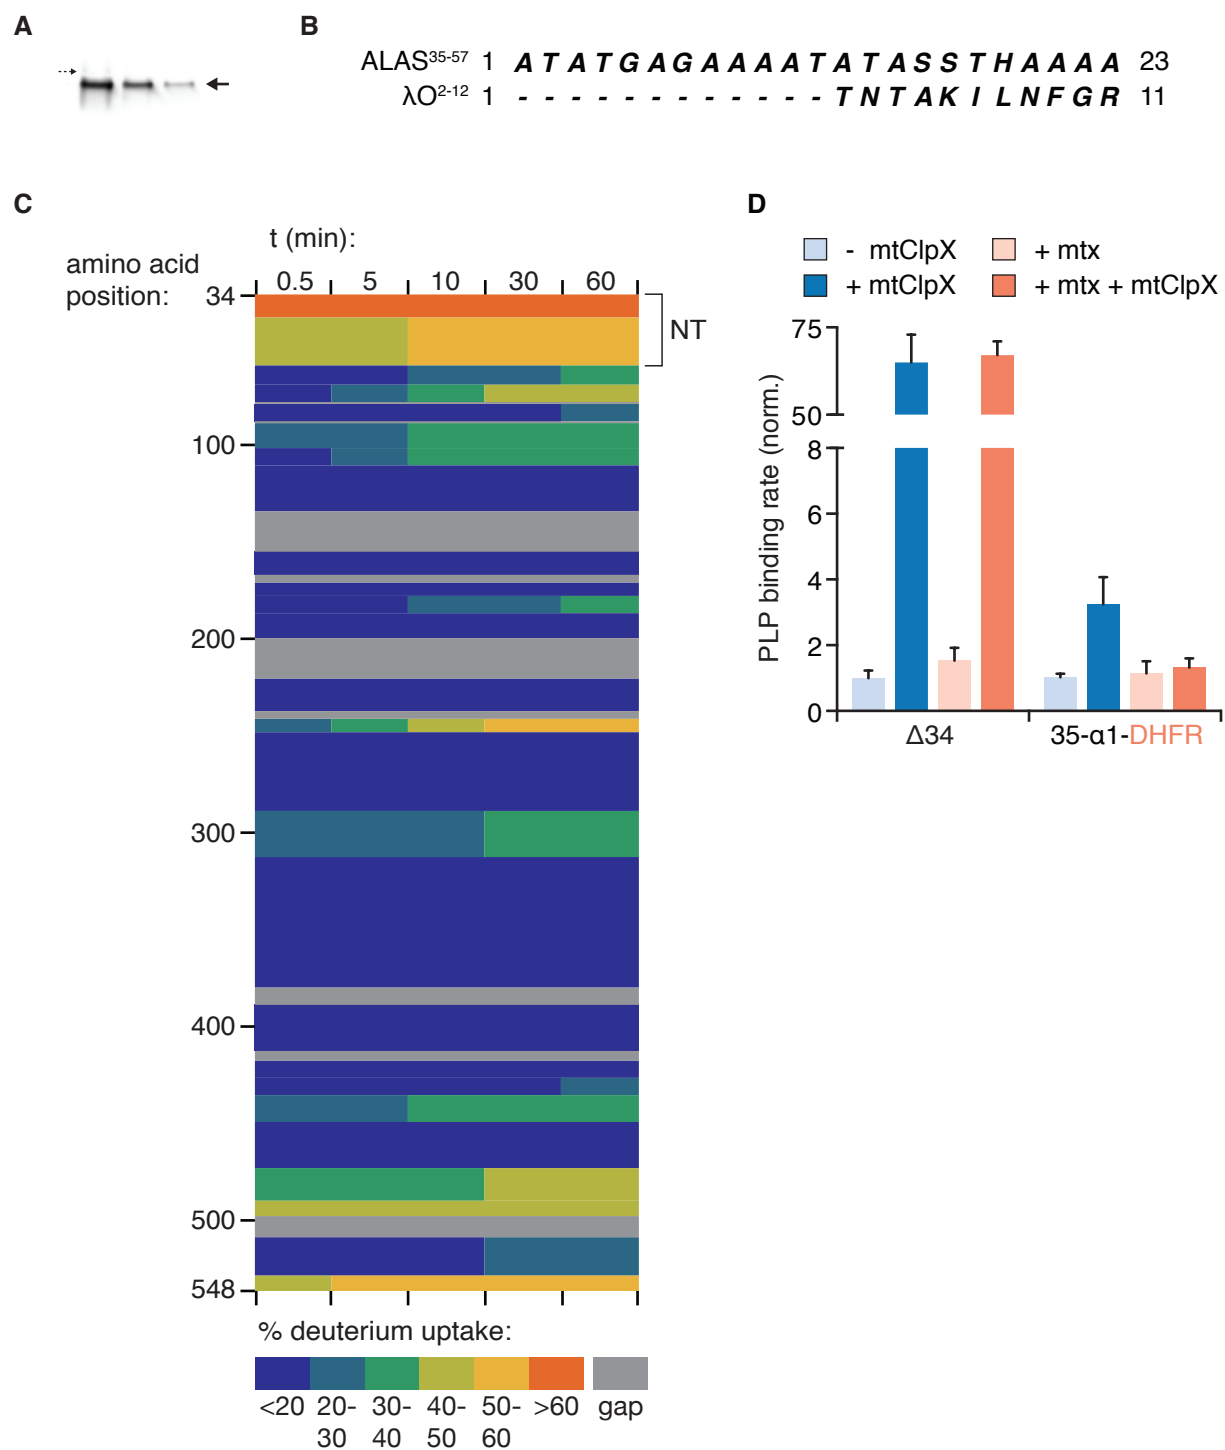

**Figure 2—figure supplement 1**

Supplement: supp [file elife_poa_e54387_Figure_2_figure_supplement_1.pdf › elife_poa_e54387_Figure_2_figure_supplement_1.pdf]

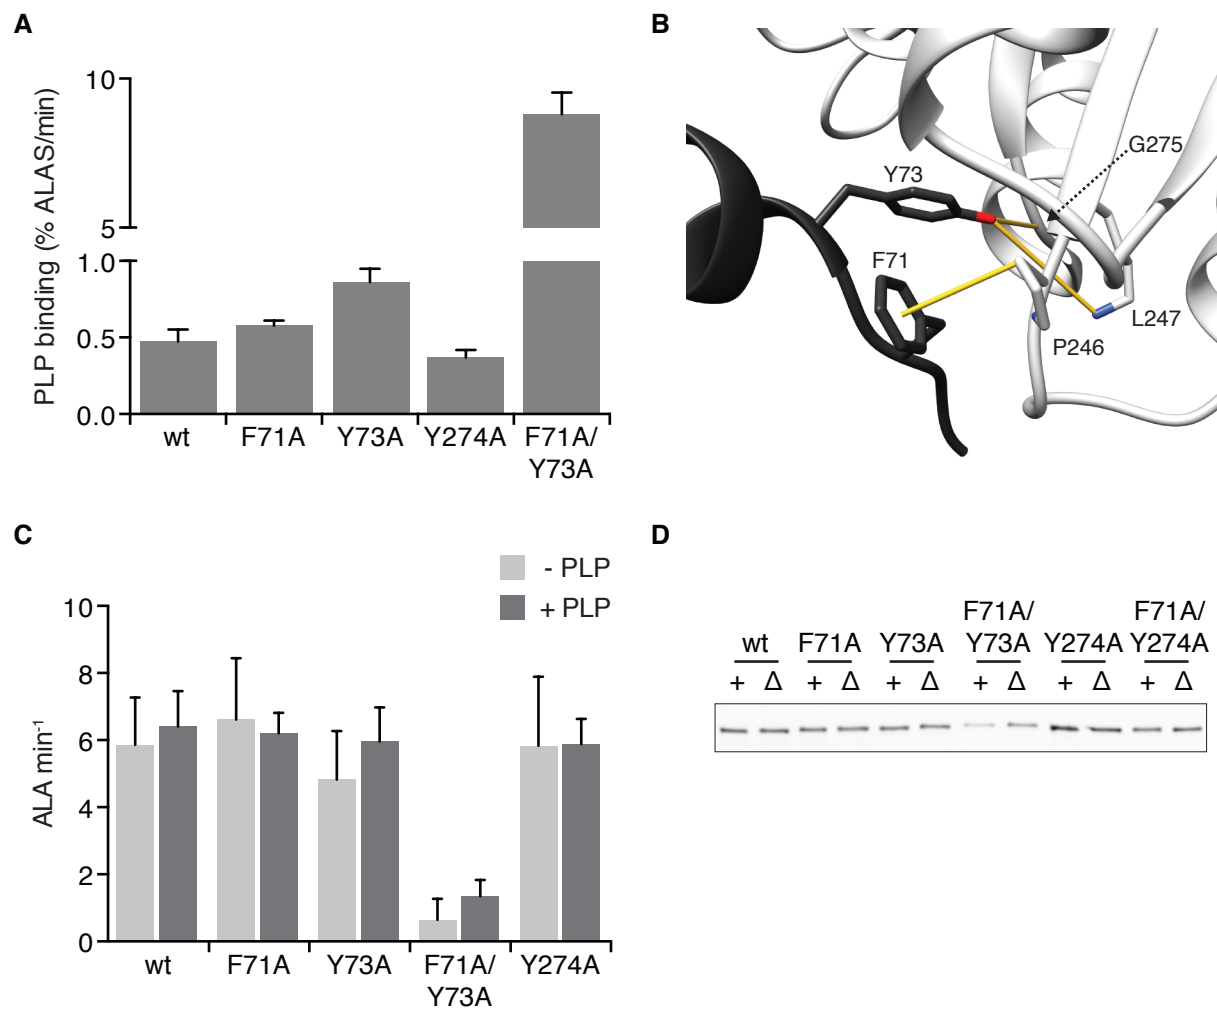

**Figure 3—figure supplement 2**

Supplement: supp [file elife_poa_e54387_Figure_3_figure_supplement_2.pdf › elife_poa_e54387_Figure_3_figure_supplement_2.pdf]

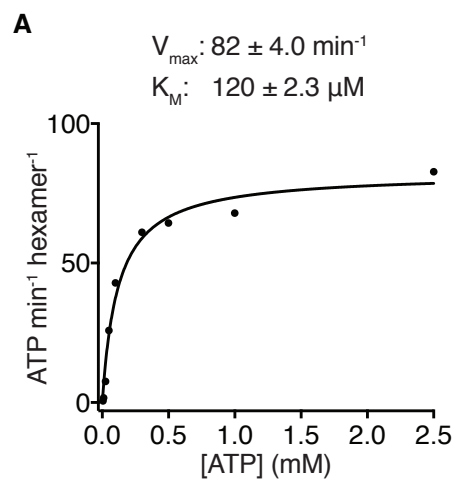

**Figure 5—figure supplement 1**

Supplement: supp [file elife_poa_e54387_Figure_5_figure_supplement_1.pdf › elife_poa_e54387_Figure_5_figure_supplement_1.pdf]

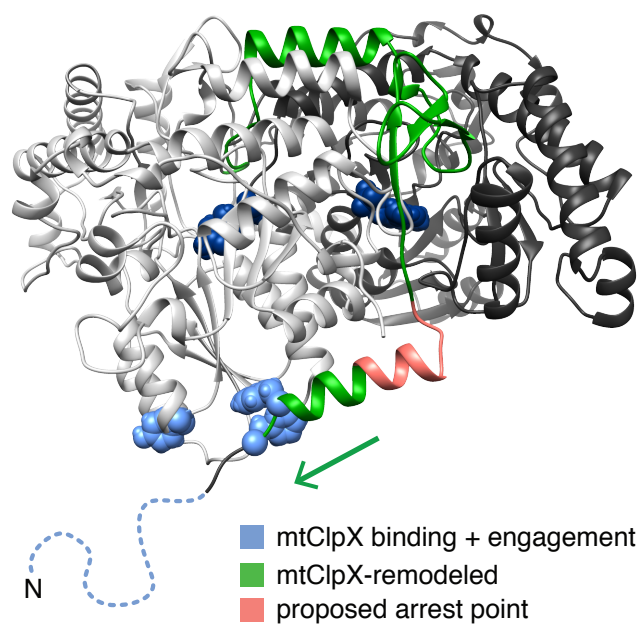

**Figure 6—figure supplement 1**

Supplement: supp [file elife_poa_e54387_Figure_6_figure_supplement_1.pdf › elife_poa_e54387_Figure_6_figure_supplement_1.pdf]
